# Supplementary material for: Kinetically controlled assembly of cadmium chalcogenide nanorods and nanorod heterostructures
Source: Royal Society of Chemistry journal article supplement (doi:10.1039/c8qm00056e), 2018-01-01
Supplement: c8qm00056e1.pdf [file c8qm00056e1.pdf]

Supplementary Information to Accompany:

**Kinetically controlled assembly of cadmium chalcogenide nanorods and nanorod heterostructures**

Michael J. Enright,<sup>a</sup> Harrison Sarsito<sup>a</sup> and Brandi M. Cossairt<sup>a\*</sup>

<sup>a</sup>University of Washington, Department of Chemistry, Box 351700, Seattle WA, 98195-1700

\*cossairt@chem.washington.edu

6 min

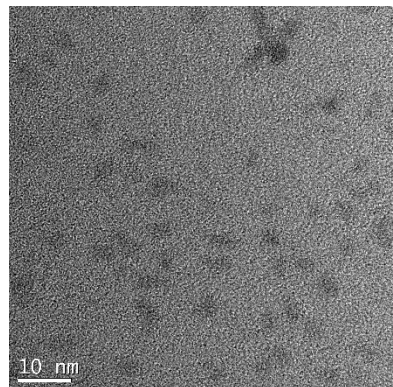

14 min

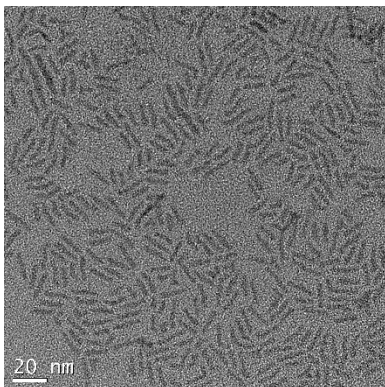

20 min

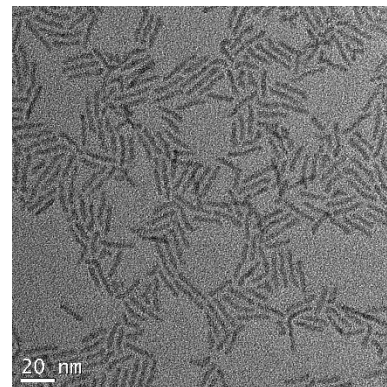

10 min

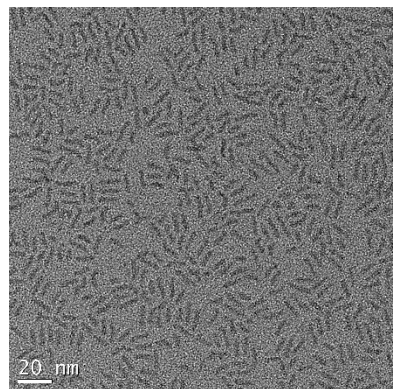

16 min

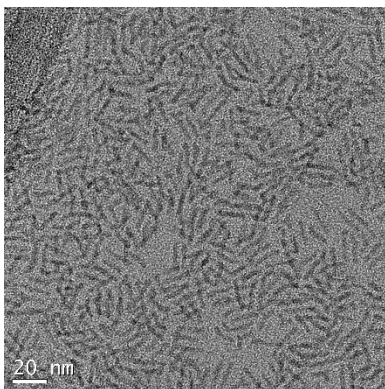

22 min

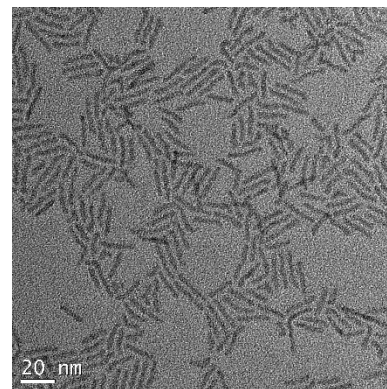

12 min

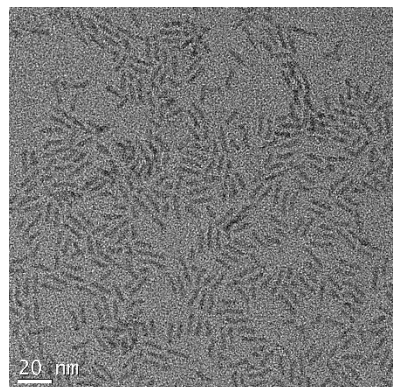

18 min

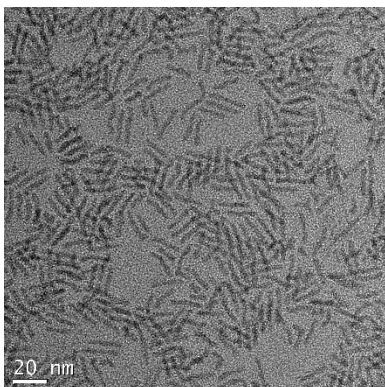

24 min

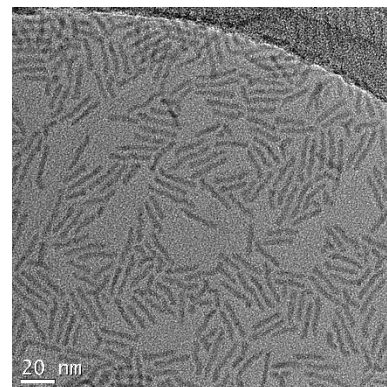

(Continues on next page)

26 min

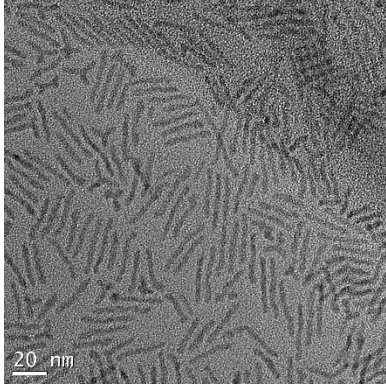

28 min

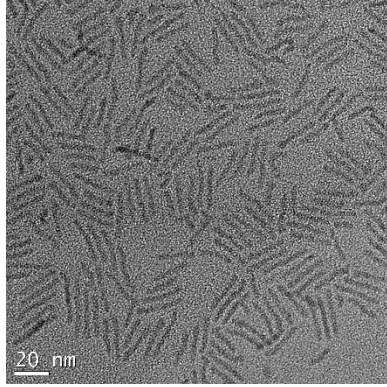

30 min

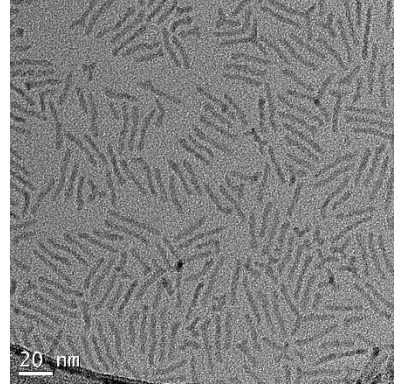

**Figure S1.** TEM images of unseeded CdSe nanorod growth corresponding with data reported in Figure 1 of the main text.

Example calculation to derive rates of rod growth for unseeded nanorods:

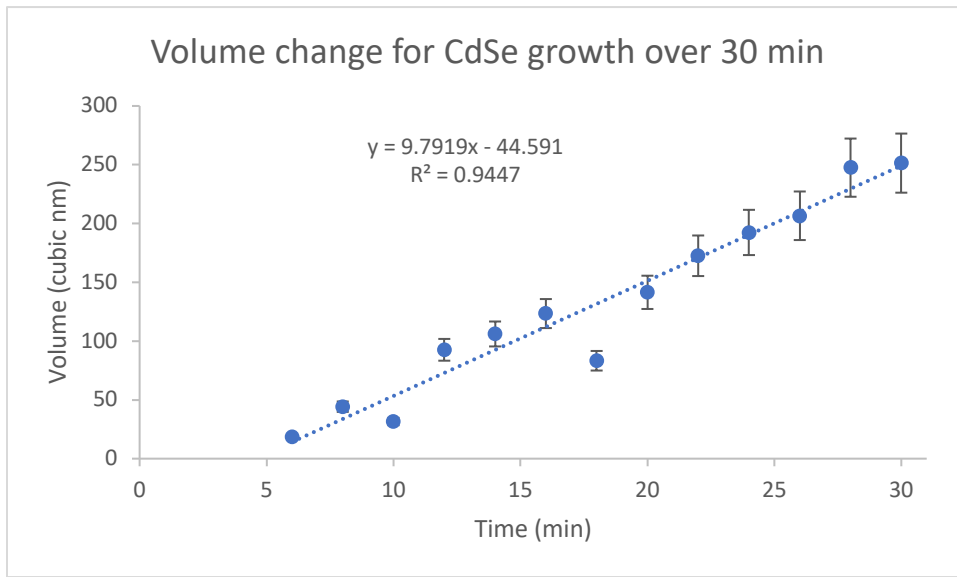

Equation from volume vs. time for unseeded CdSe nanorod growth:  $y = 9.7919x - 44.591$

The slope, 9.7919, is the rate of volume added to a growing rod every minute.

The volume of a CdSe unit cell is  $112.25 \text{ \AA}^3$  and each unit cell is composed of 4 atoms (2 Cd and 2 Se)

$$\text{Thus, } \left( \frac{9.7919 \text{ nm}^3}{\text{min}} \right) \left( \frac{1 \text{ unit cell}}{0.11225 \text{ nm}^3} \right) \left( \frac{2 \text{ Cd or Se}}{1 \text{ unit cell}} \right) \left( \frac{1 \text{ min}}{60 \text{ s}} \right) = 2.9 \text{ monomers rod}^{-1} \text{ s}^{-1}$$



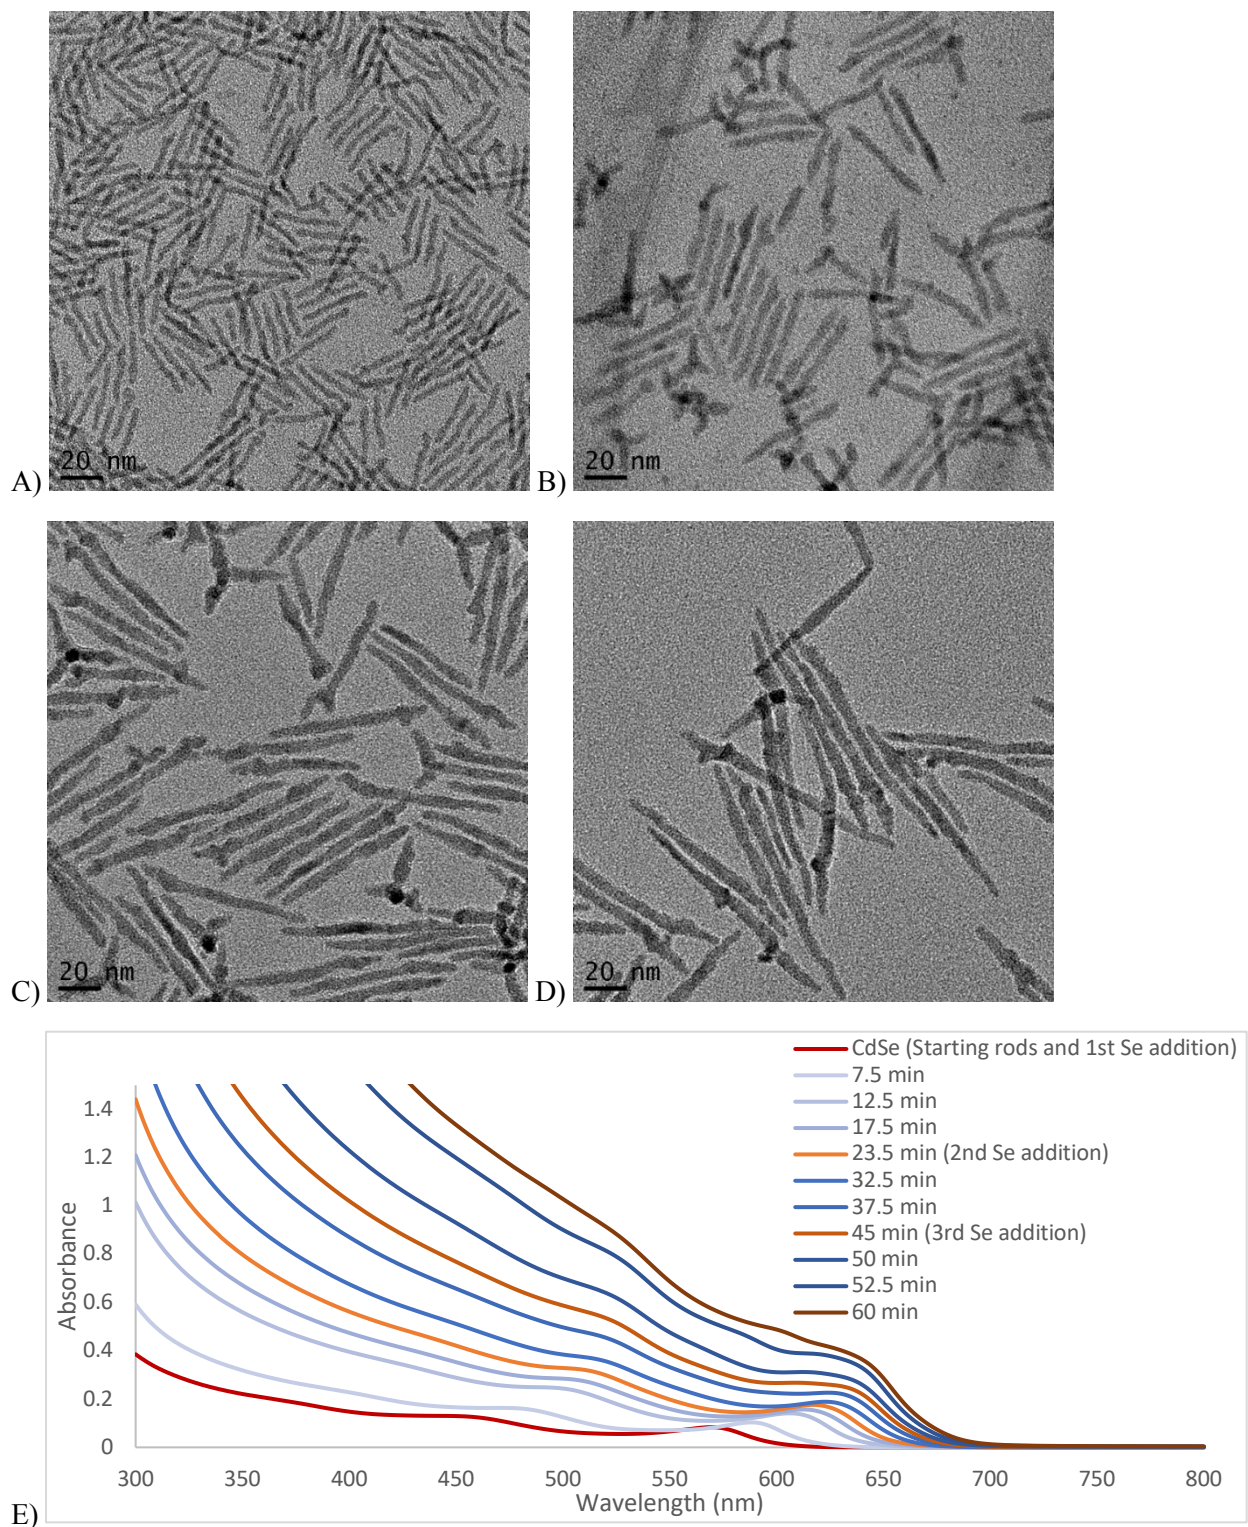

**Figure S2.** Progressive elongation of CdSe on  $27.6 \pm 2.9$  nm by  $2.9 \pm 0.4$  nm nanorods (A). The increased dimensions are  $44.4 \pm 6.5$  nm by  $4.4 \pm 0.6$  nm after 30 min (B),  $69.8 \pm 9.1$  nm by  $5.2 \pm 0.8$  nm after 30 min (C), and  $99.3 \pm 15.1$  nm  $5.9 \pm 1.0$  nm after 65 min (D). The increasing nanorod size the product of three subsequent additions of TOP-Se to a bath of excess cadmium tetradecylphosphonate (Cd-TDPA) precursor. UV-Vis of growing nanorods is also included (E).

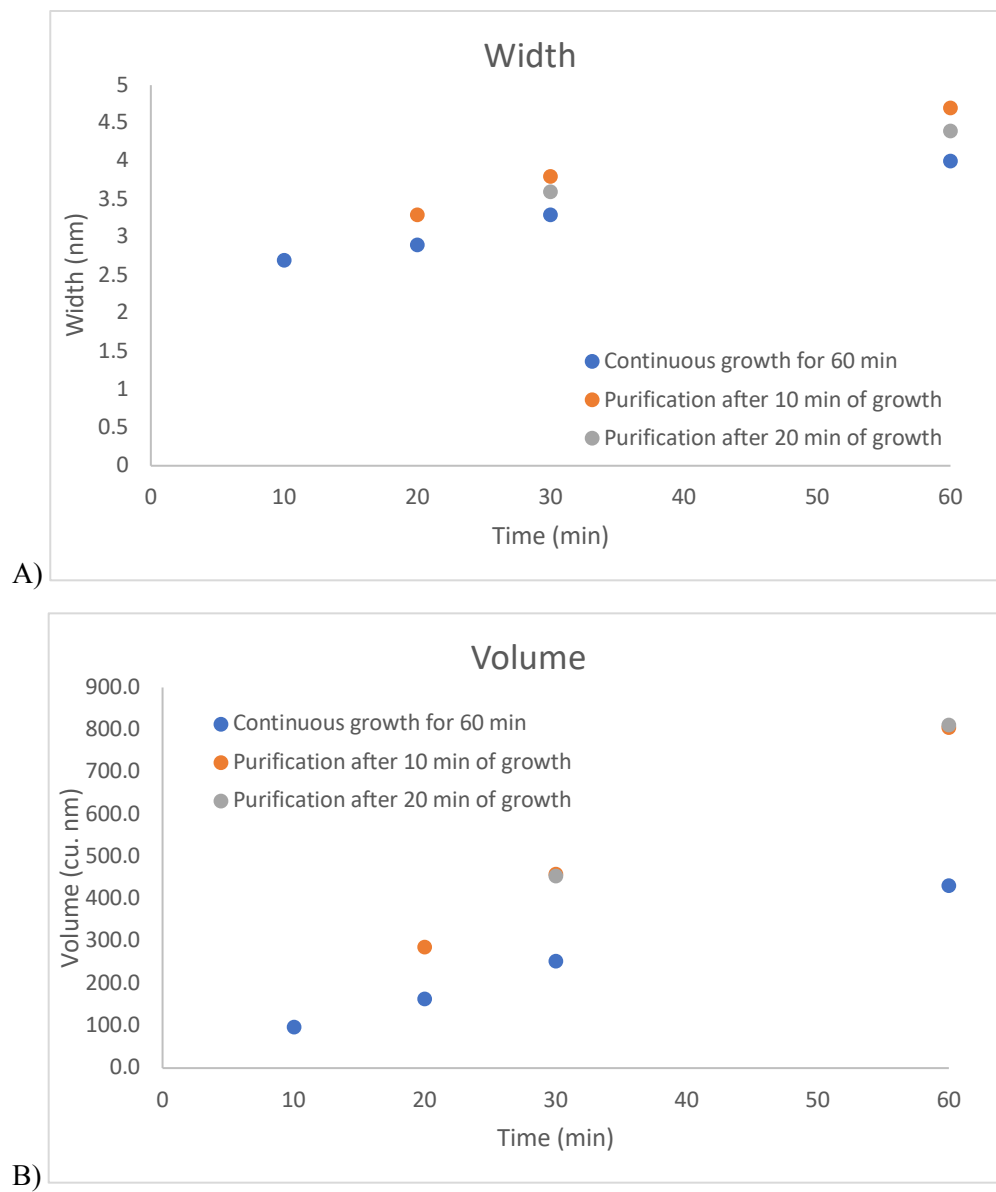

**Figure S3.** Width (A) and volume (B) vs time for the growth-purify-restart method of rod elongation corresponding to the same data set reported in Figure 2 of the main text.



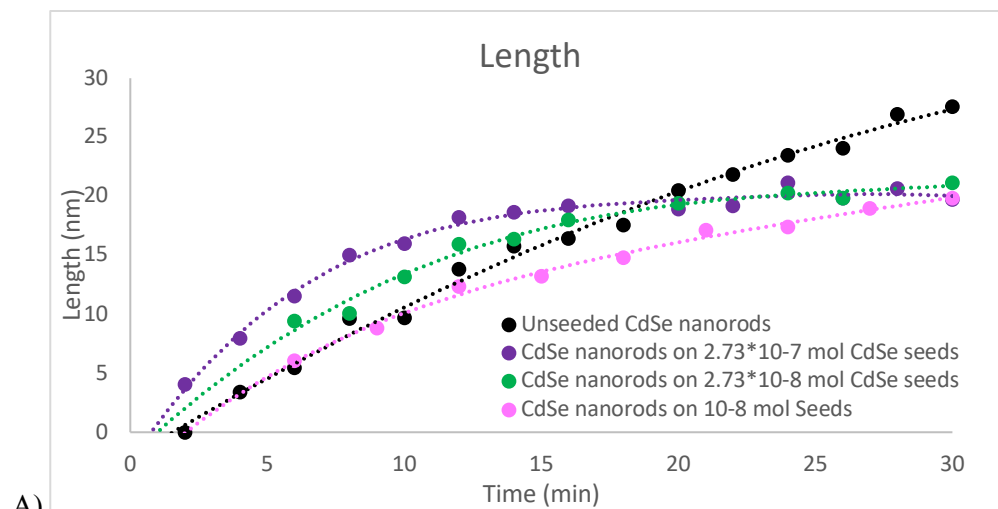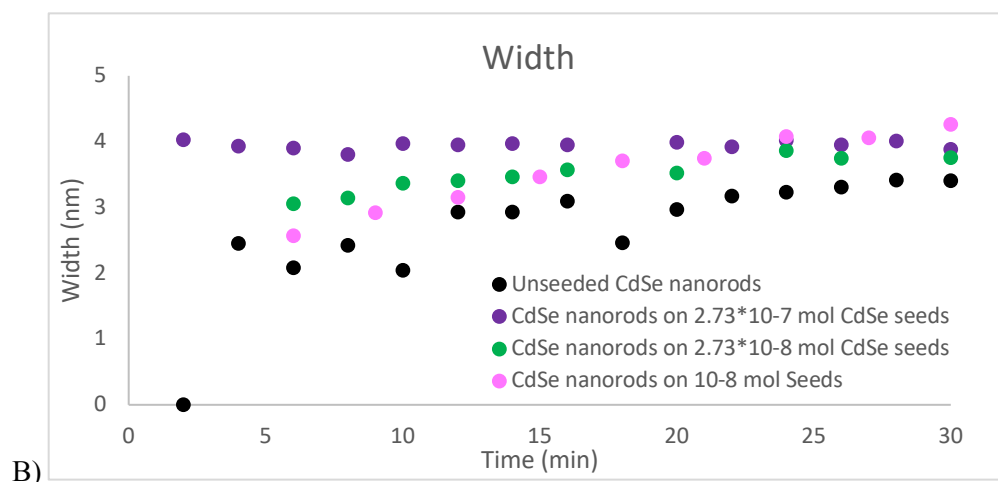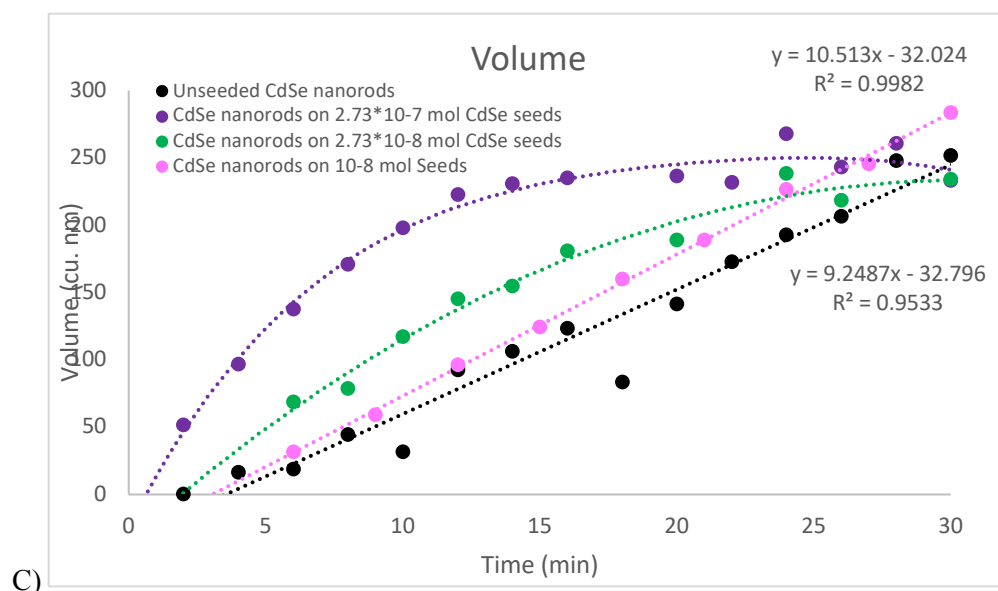

(Continues on next page)

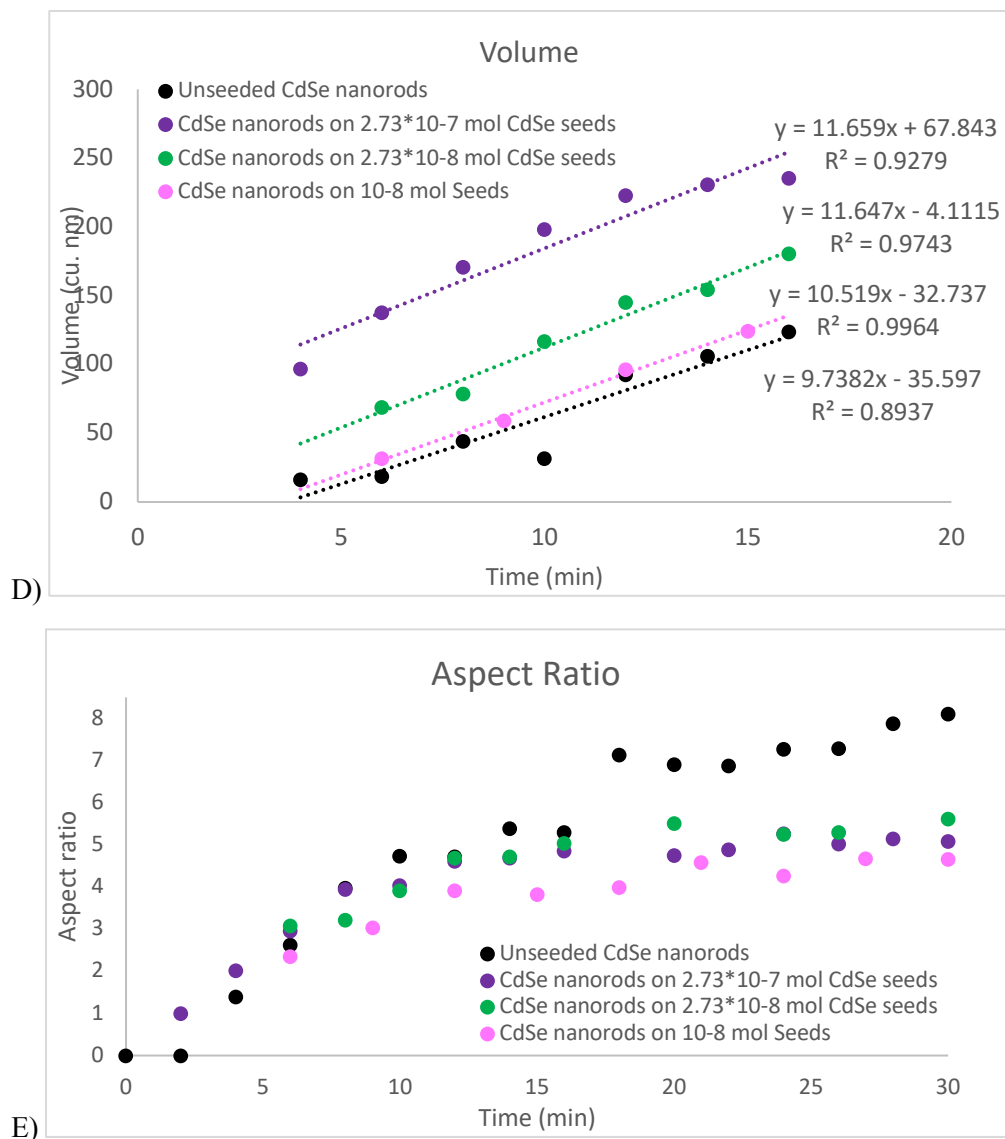

**Figure S4.** CdSe nanorod growth on CdSe seeds. Length (A), width (B), volume (C and D), and aspect ratio (E) are tracked over the duration of each reaction. (D) is a slope evaluation between 4-16 min, the period of time dominated by length growth, used to determine monomer addition rates for each seeded synthesis. Rod growth occurs at  $2.9 \text{ monomers rod}^{-1} \text{ s}^{-1}$  for unseeded nanorods,  $3.5 \text{ monomers rod}^{-1} \text{ s}^{-1}$  for  $2.73 \times 10^{-7} \text{ mol}$  and  $2.73 \times 10^{-8} \text{ mol}$  seeds.

2 min (CdSe seeds)

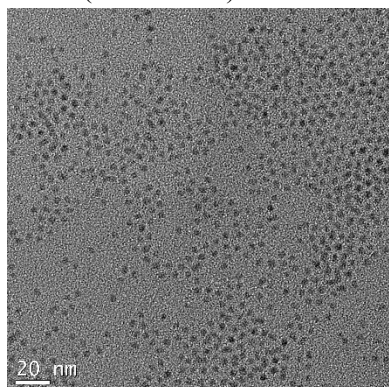

10 min

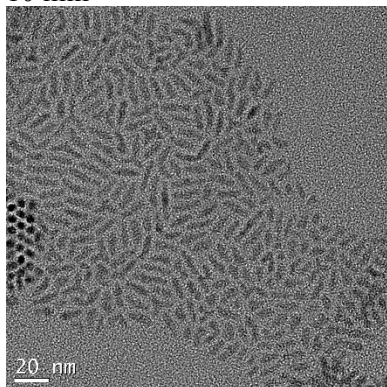

18 min

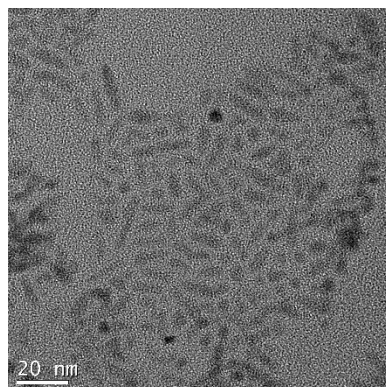

4 min

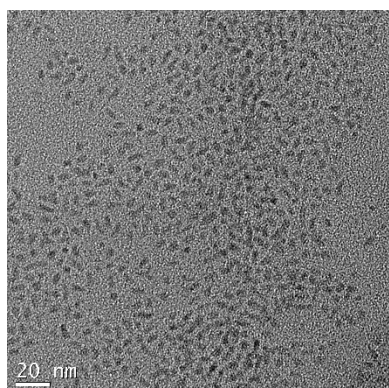

12 min

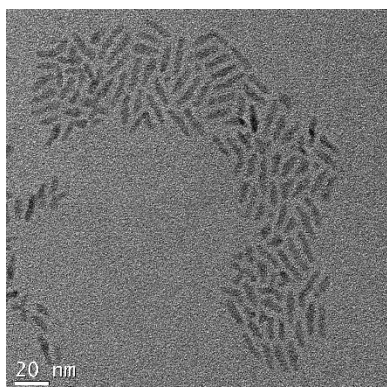

20 min

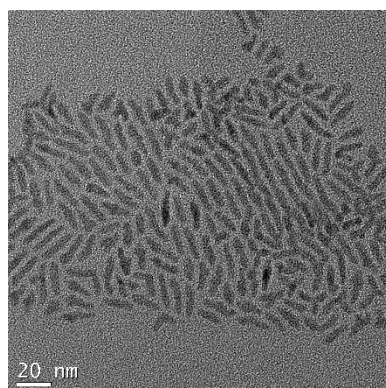

6 min

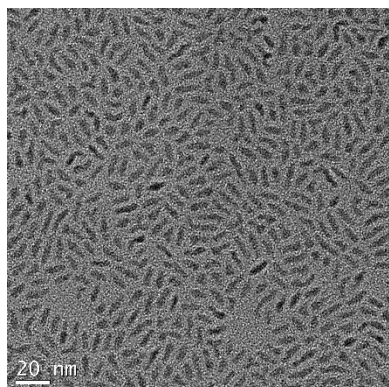

14 min

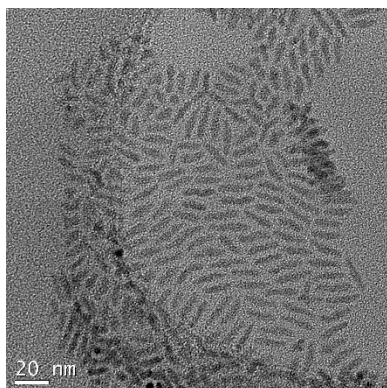

22 min

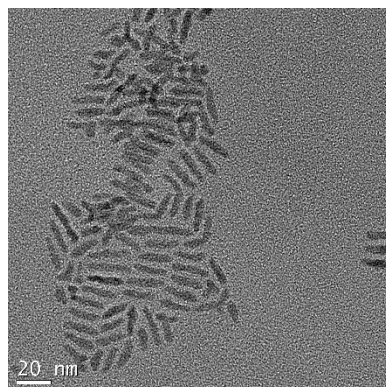

8 min

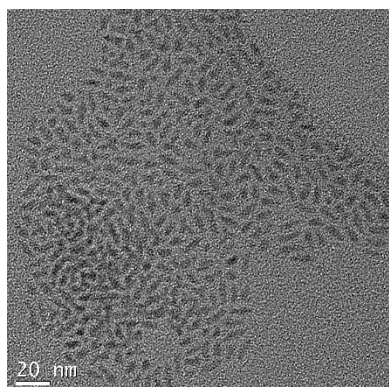

16 min

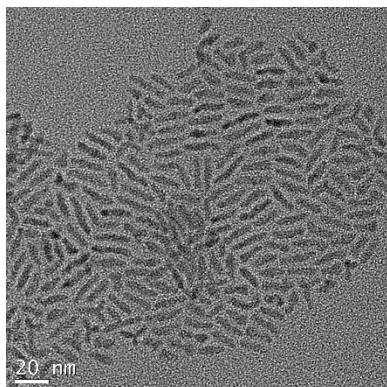

24 min

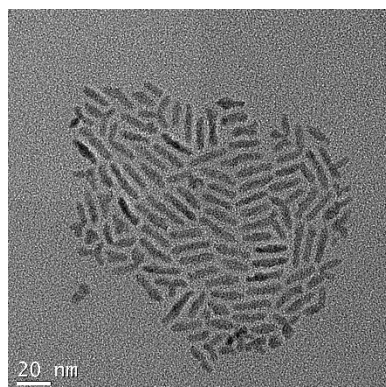



26 min

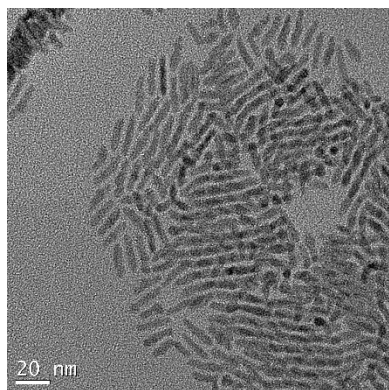

28 min

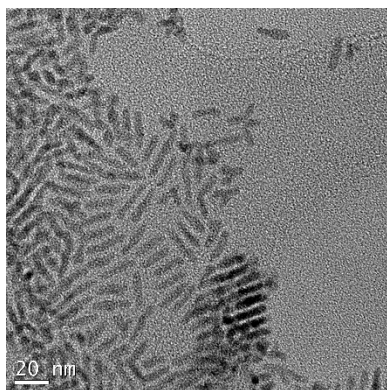

30 min

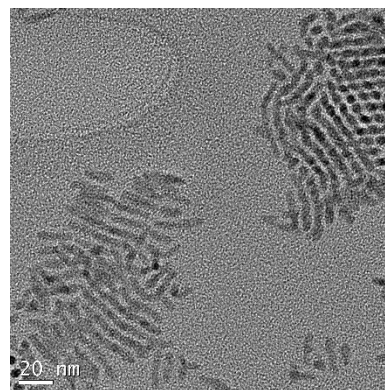

**Figure S5.** TEM images of growing CdSe nanorods upon  $2.73 \times 10^{-7}$  mol seeds.

6 min

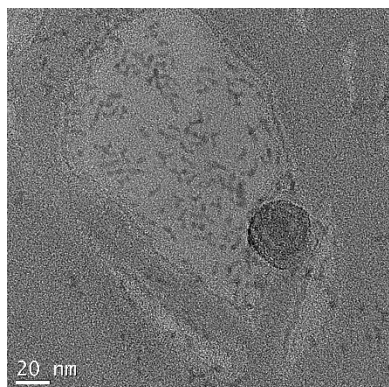

12 min

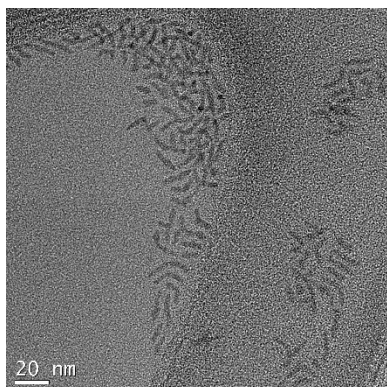

20 min

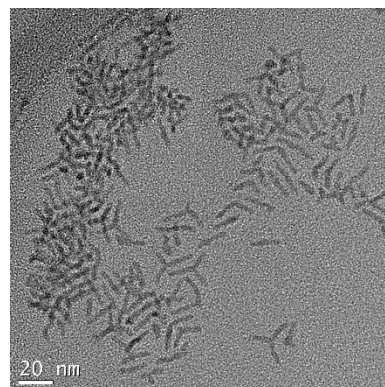

8 min

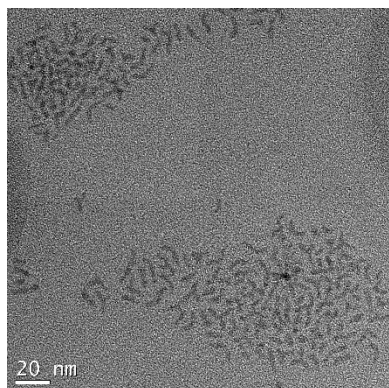

14 min

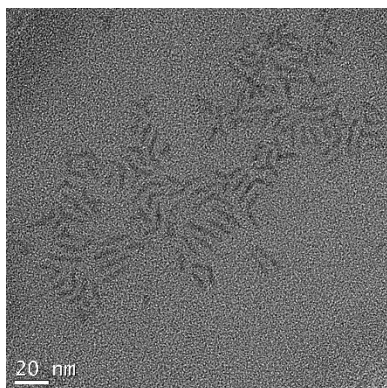

24 min

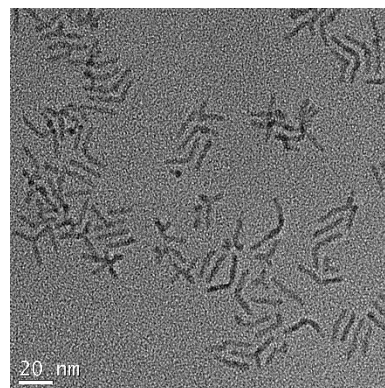

10 min

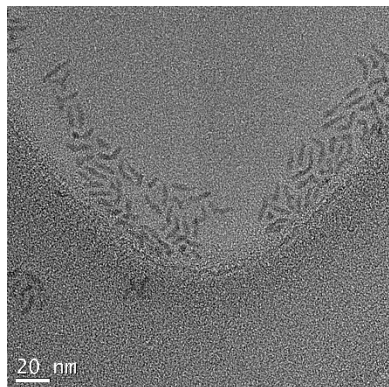

16 min

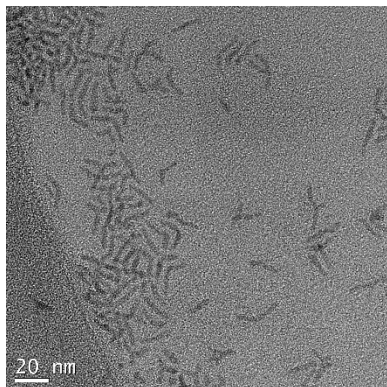

26 min

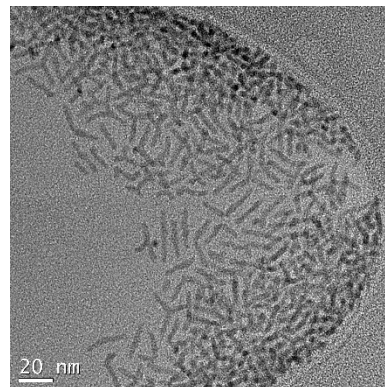

30 min

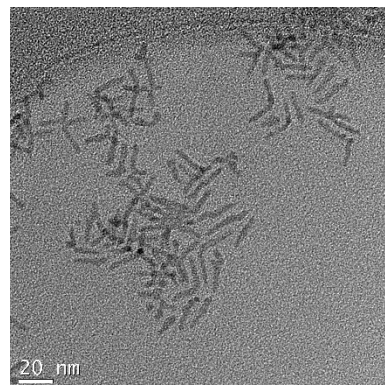

**Figure S6.** TEM images of growing CdSe nanorods upon  $2.73 \times 10^{-8}$  mol seeds.

6 min

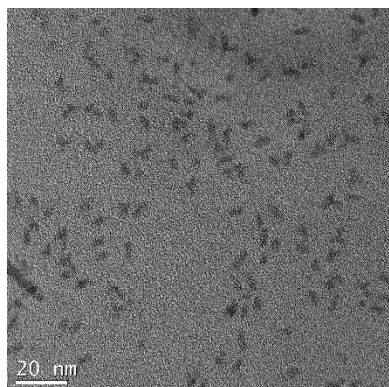

15 min

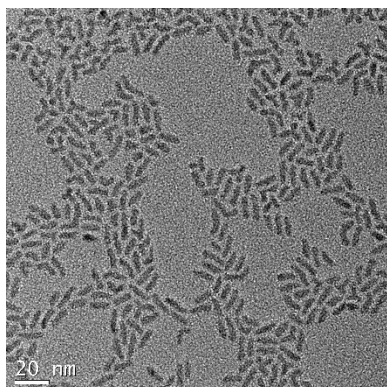

24 min

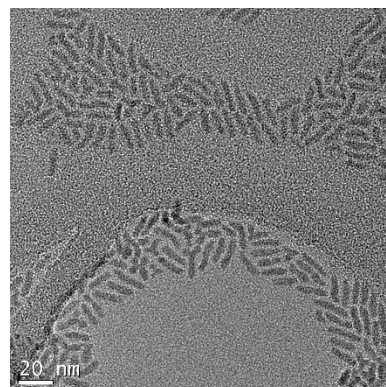

9 min

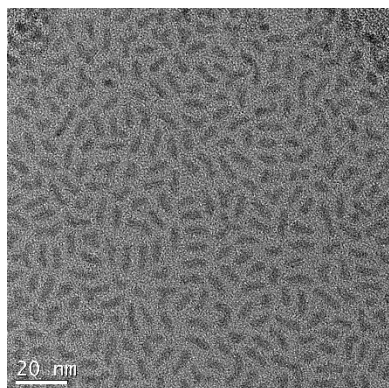

18 min

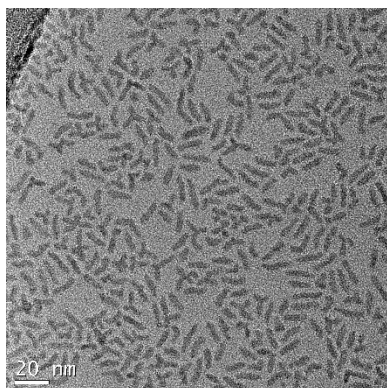

27 min

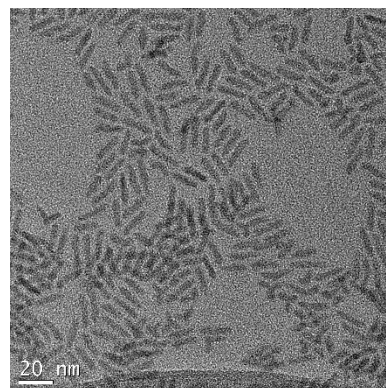

12 min

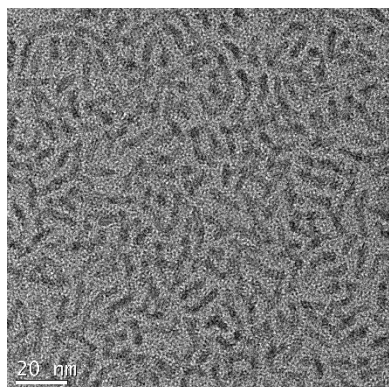

21 min

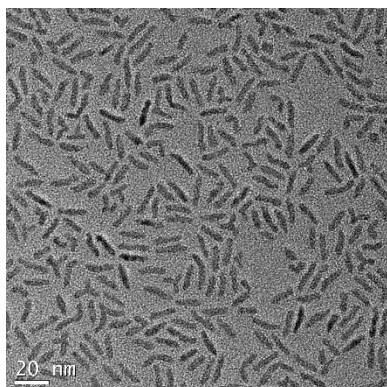

30 min

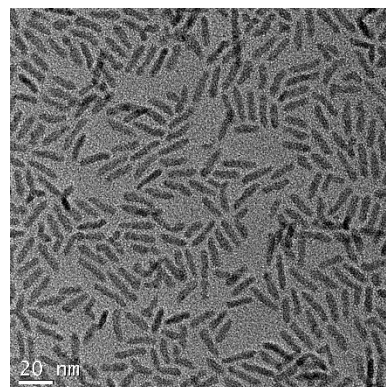

(Continues on next page)



36 min

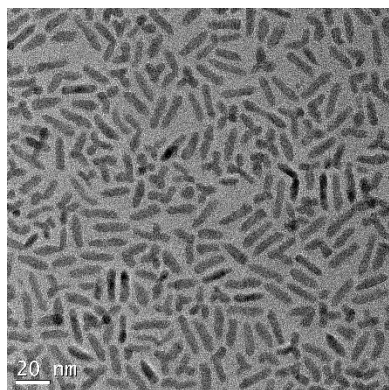

1 hr 30 min

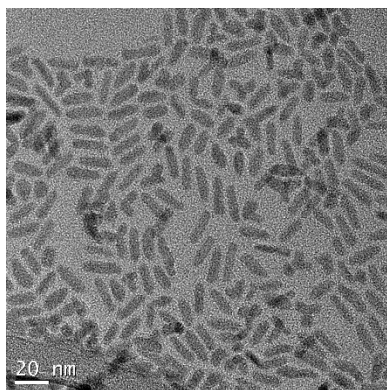

2 hr 30 min

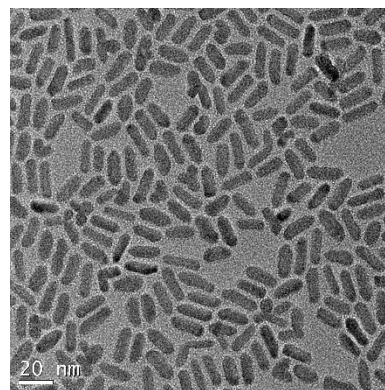

**Figure S7.** TEM images of growing CdSe nanorods upon  $1.0 \times 10^{-8}$  mol seeds.

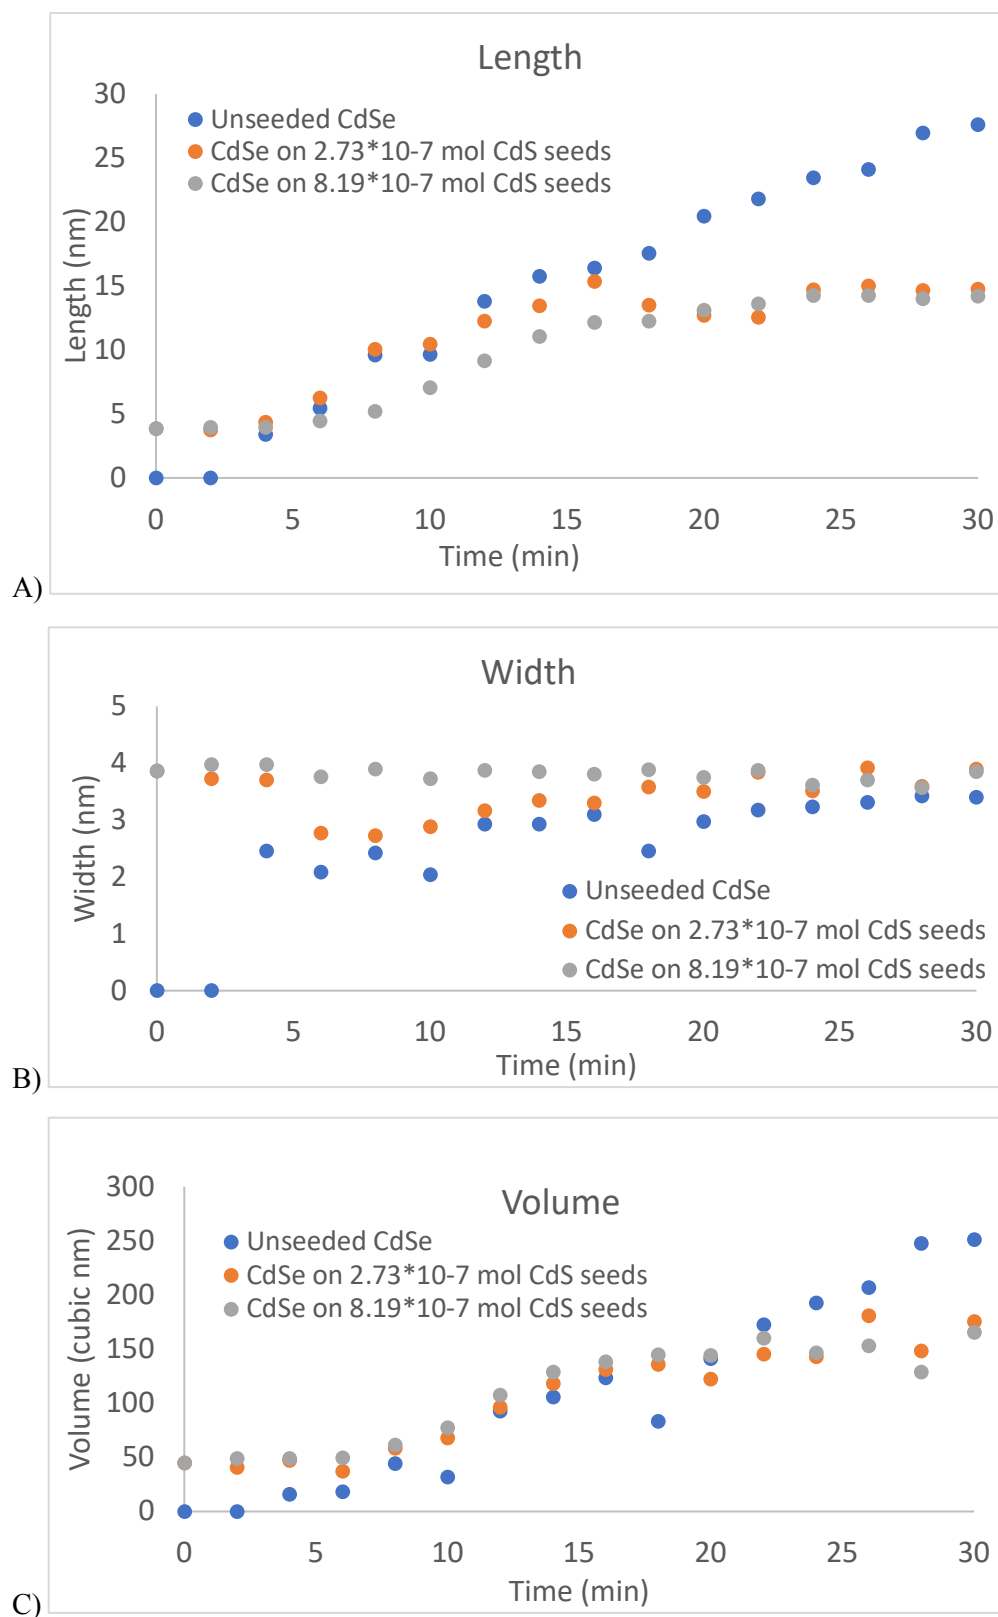

**Figure S8.** The length (A), width (B), and volume (C) profiles over time for CdSe nanorod growth when seeded with wurtzite CdS seeds.

2 min (CdS seeds)

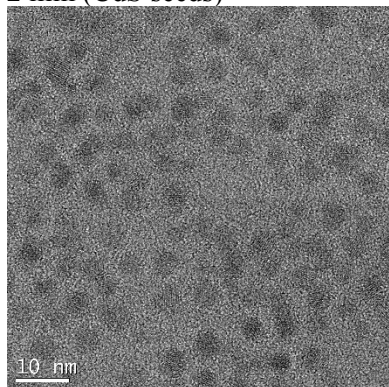

10 min

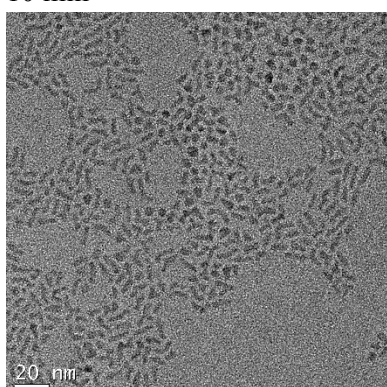

18 min

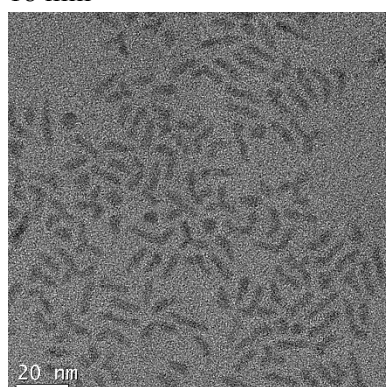

4 min

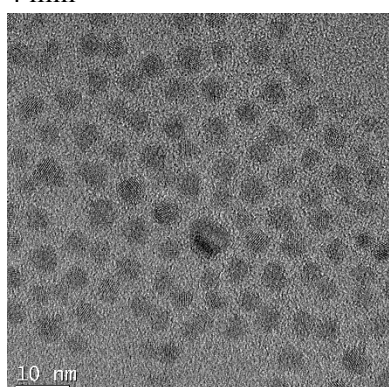

12 min

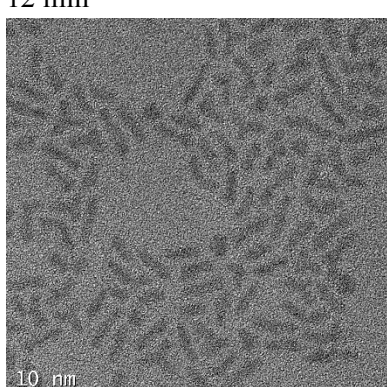

20 min

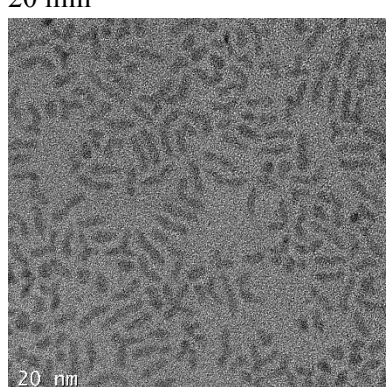

6 min

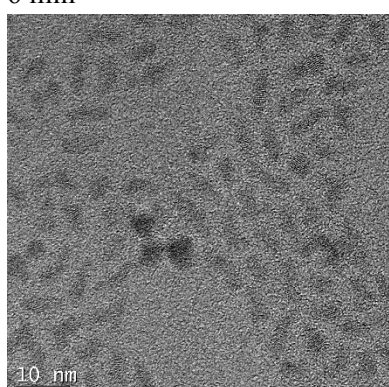

14 min

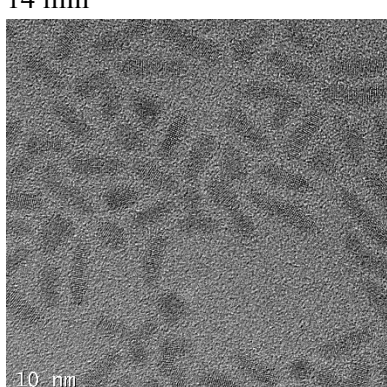

24 min

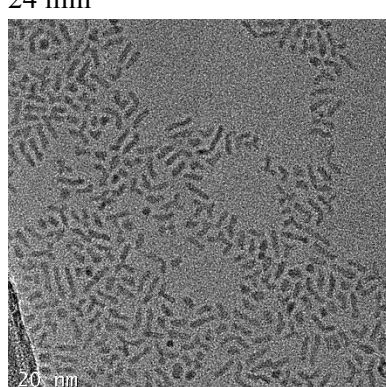

8 min

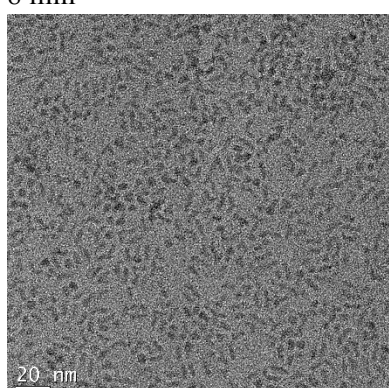

16 min

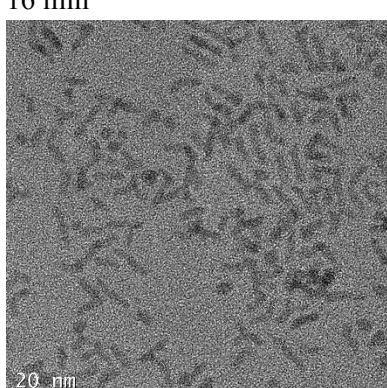

26 min

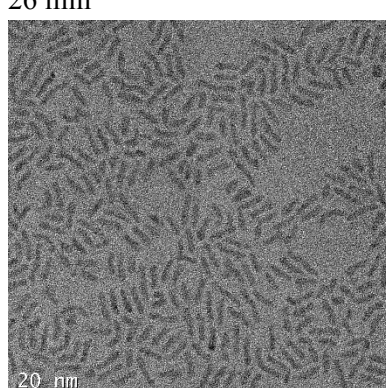



28 min

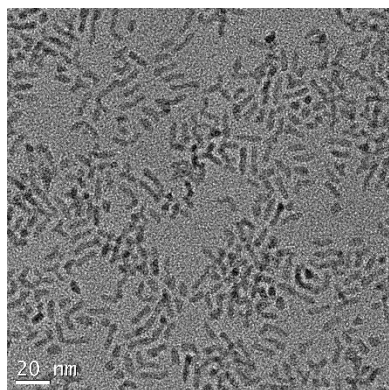

30 min

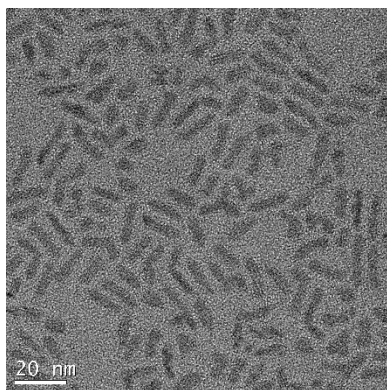

**Figure S9.** TEM images of CdSe nanorod growth on  $2.73 \times 10^{-7}$  mol CdS seeds.

2 min

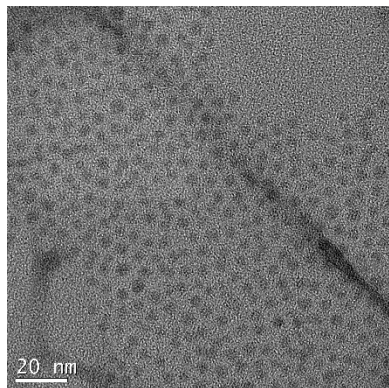

10 min

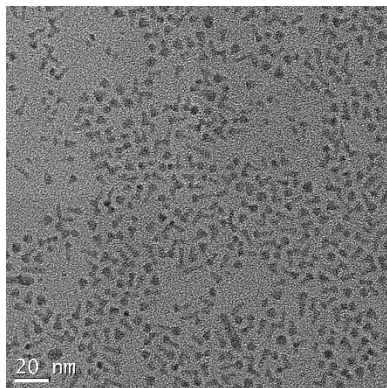

18 min

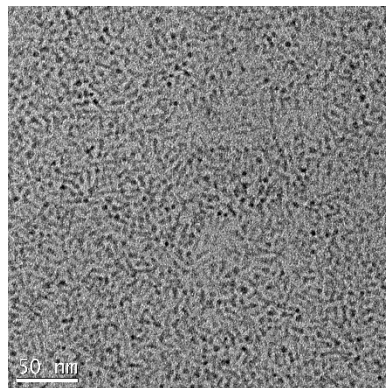

4 min

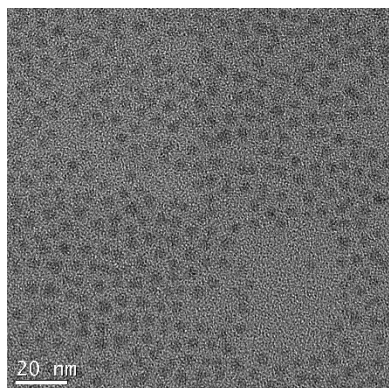

12 min

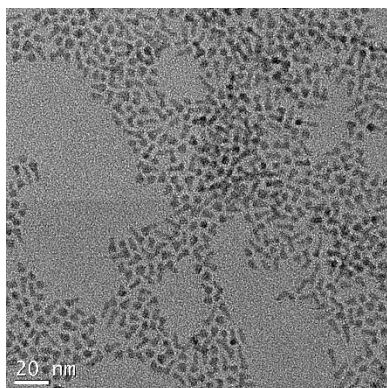

20 min

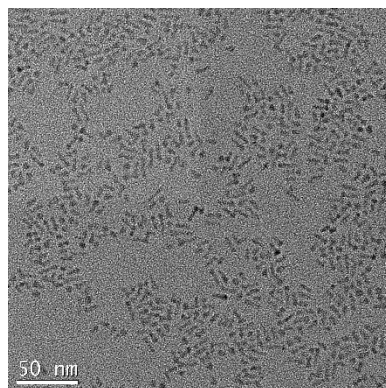

6 min

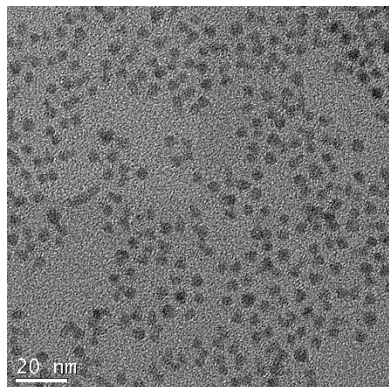

14 min

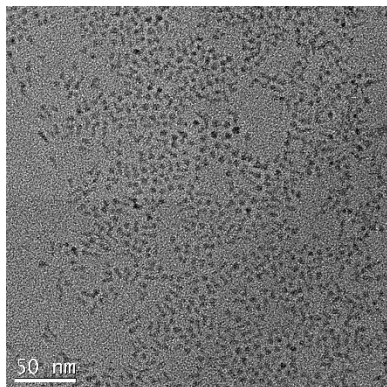

22 min

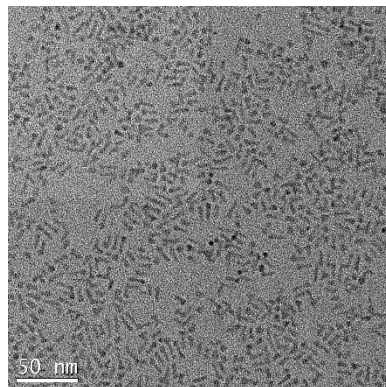

8 min

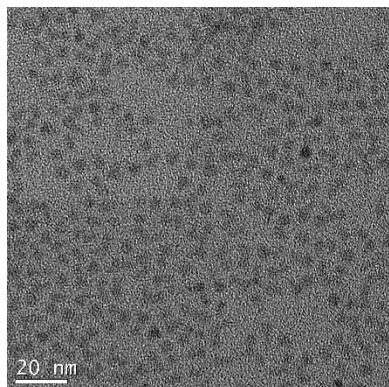

16 min

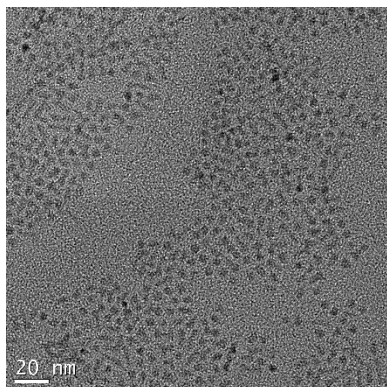

24 min

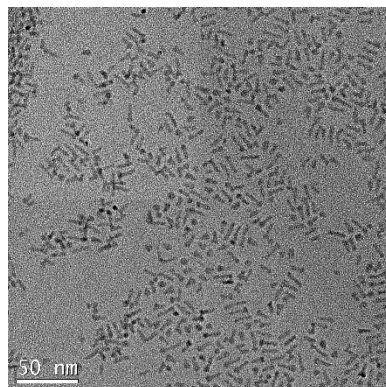

26 min

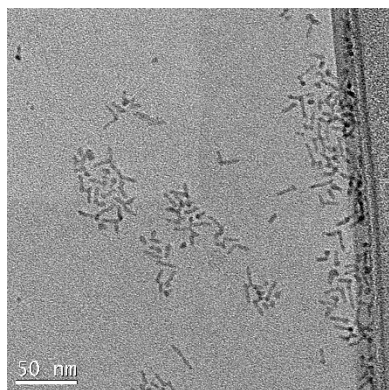

28 min

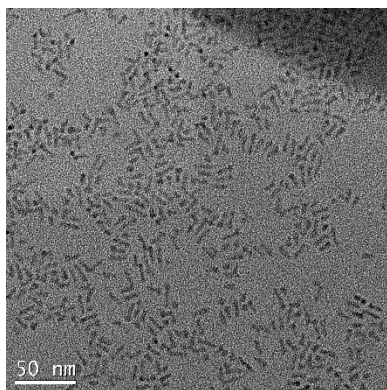

30 min

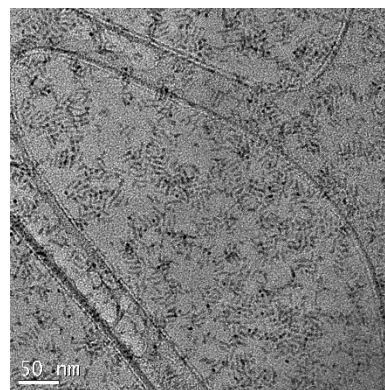

**Figure S10.** TEM images of CdSe nanorod growth on  $8.19 \times 10^{-7}$  mol CdS seeds.



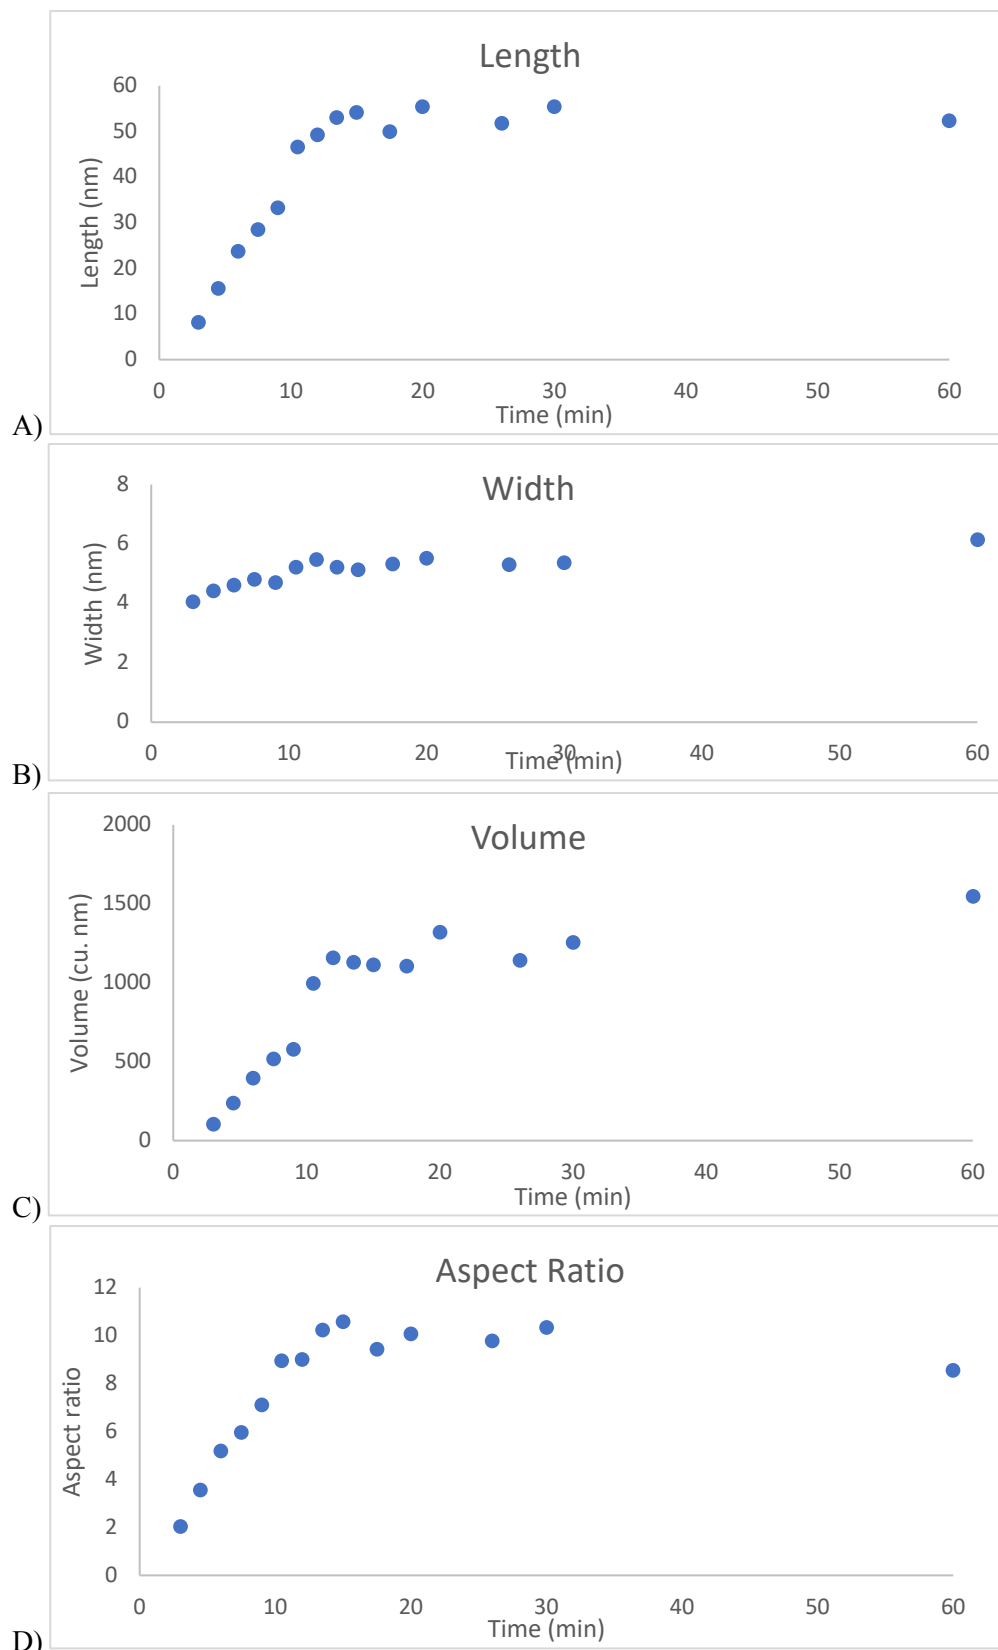

**Figure S11.** CdS growth on CdSe seeds: Length (A), width (B), volume (C), and aspect ratio (D) over time.

3 min

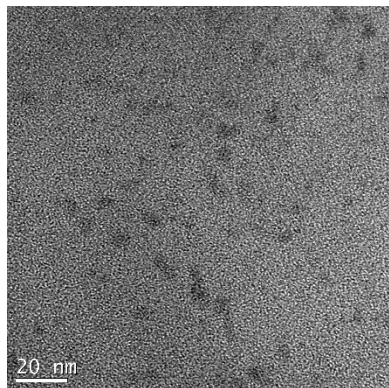

9 min

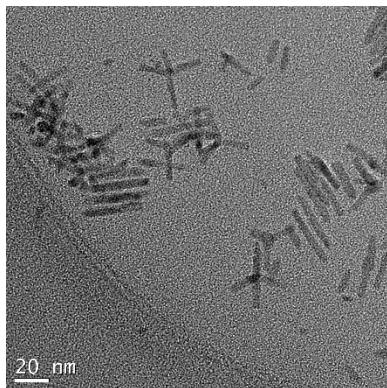

15 min

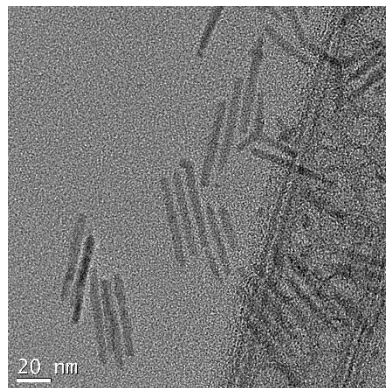

4.5 min

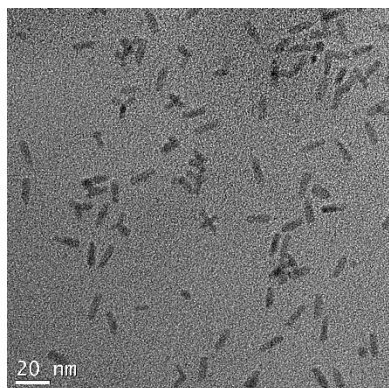

10.5 min

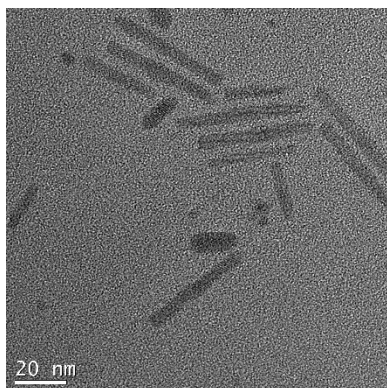

17.5 min

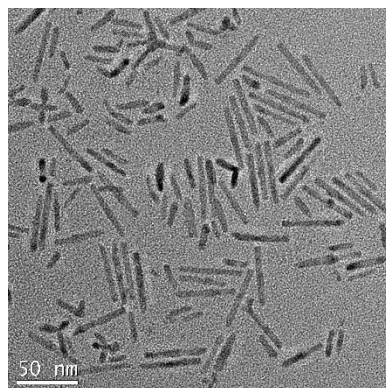

6 min

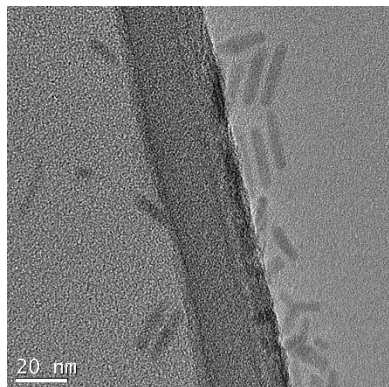

12 min

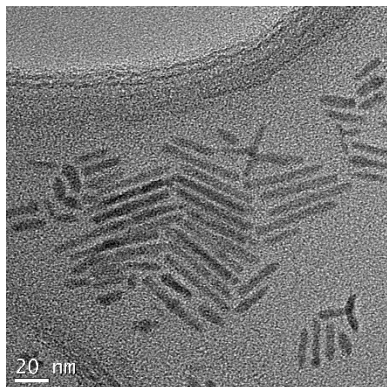

20 min

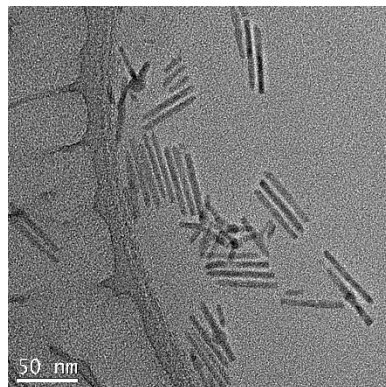

7.5 min

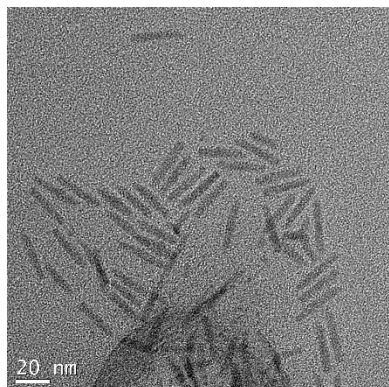

13.5 min

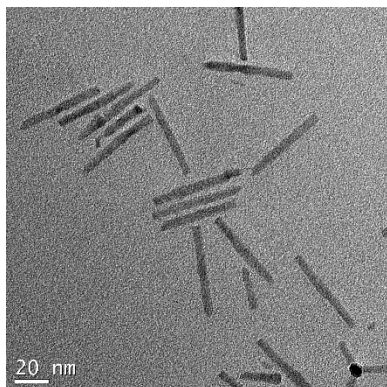

26 min

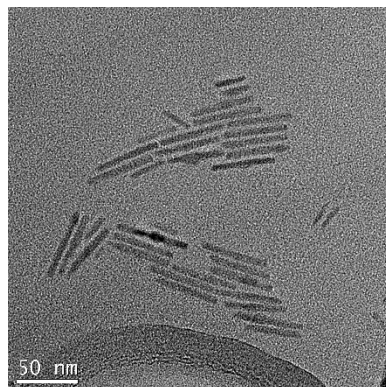

30 min

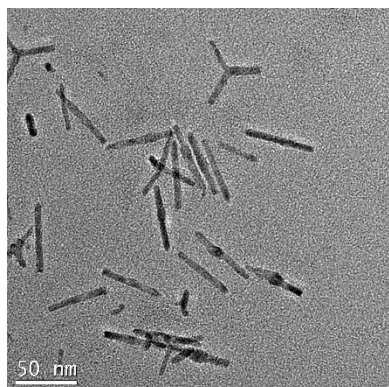

60 min

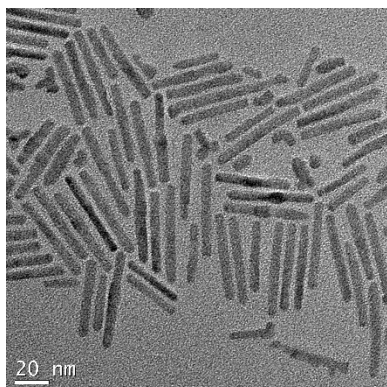

**Figure S12.** TEM images of the growing CdS nanorods on CdSe seeds.

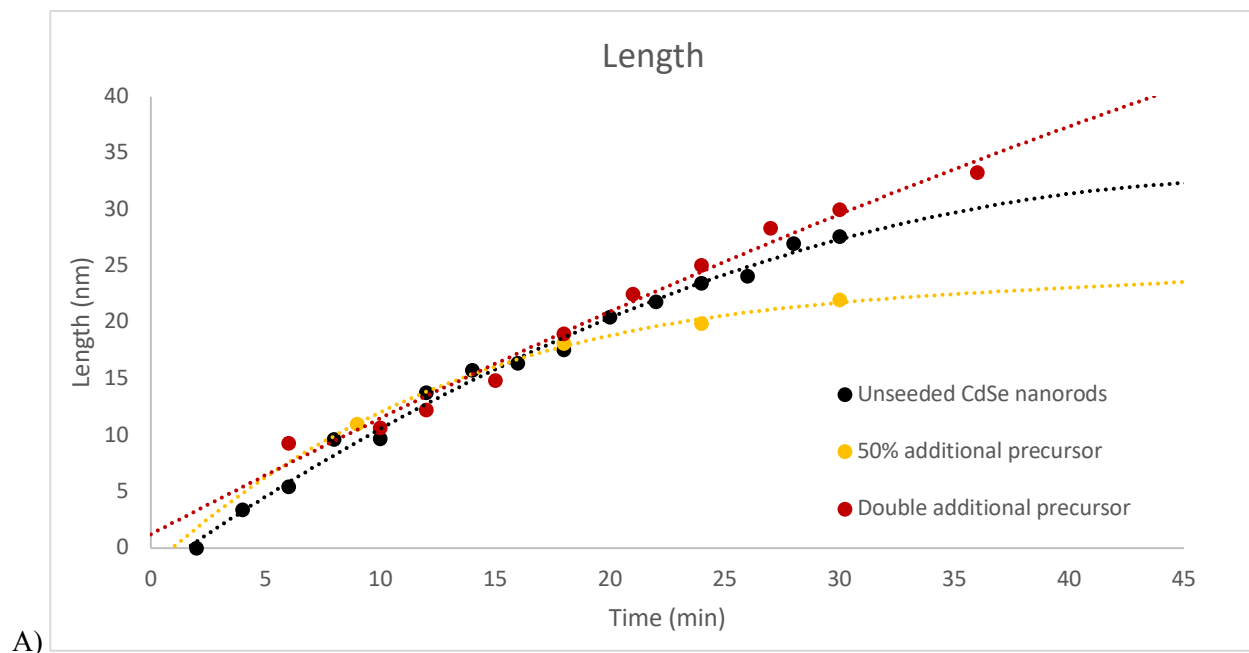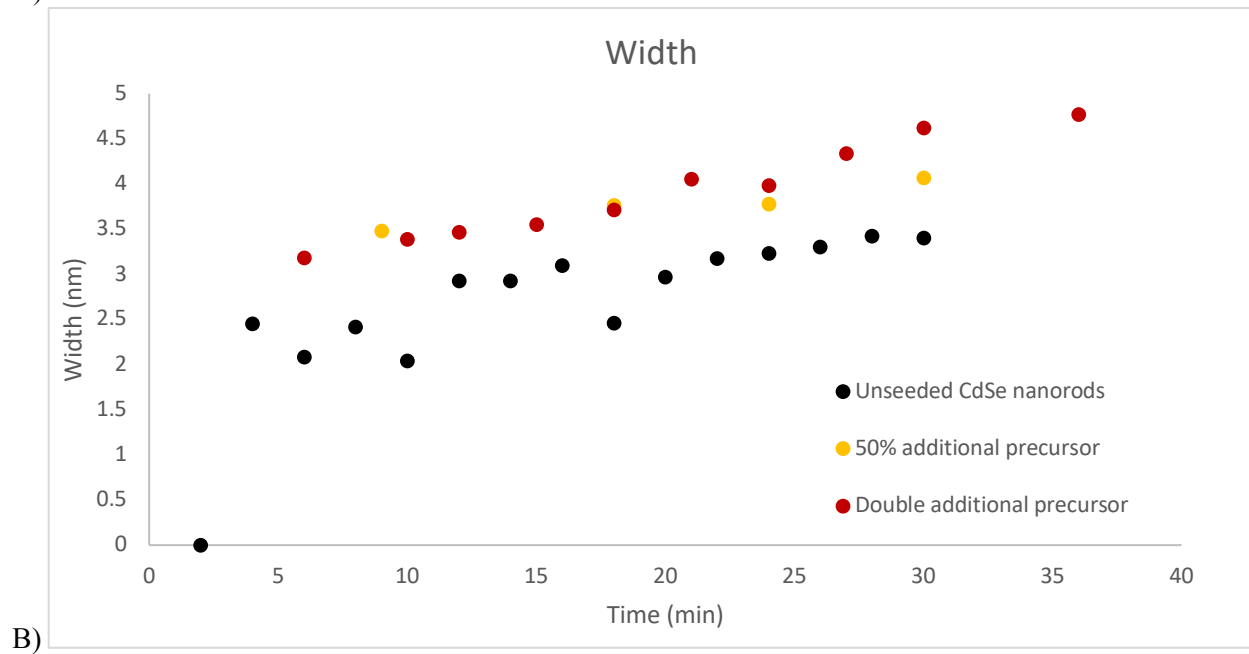

(Continues on next page)



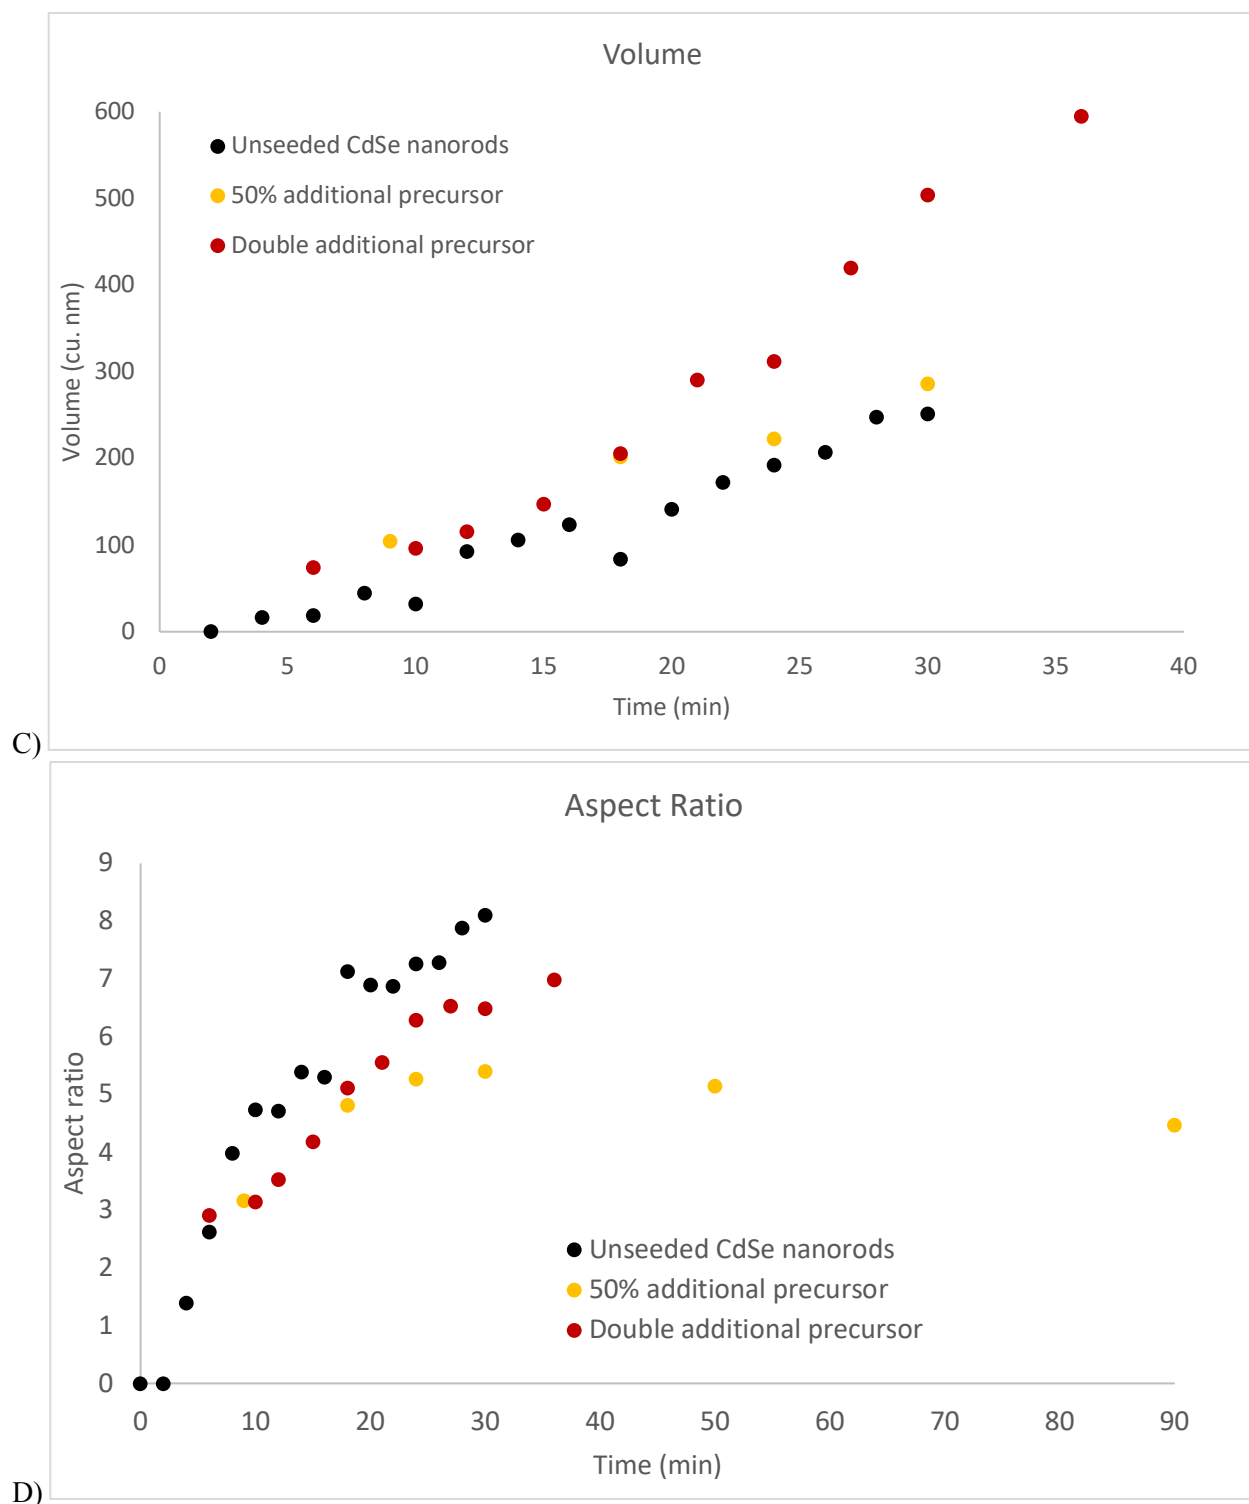

**Figure S13.** The length (A), width (B), volume (C), and aspect (D) profiles are tracked over time for CdSe nanorod growth facilitated by replenishment of additional precursor added all at once at 7 min 30 s.

6 min

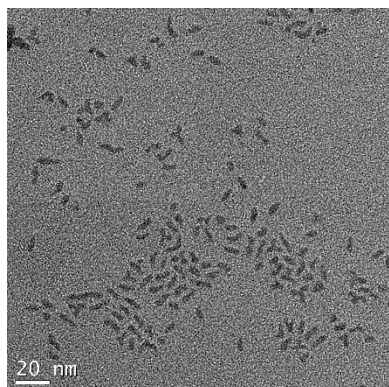

18 min

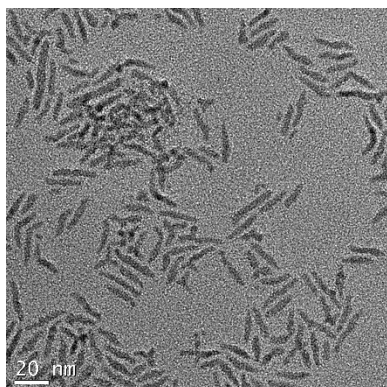

30 min

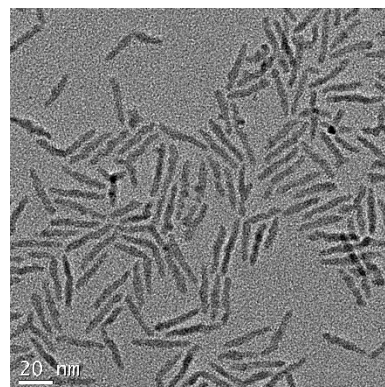

10 min 20 s

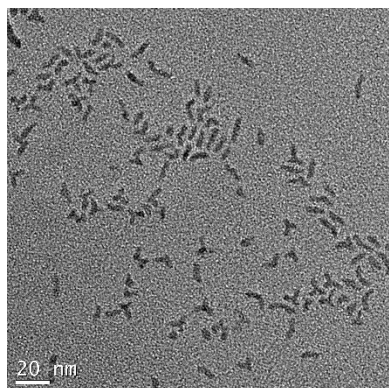

21 min

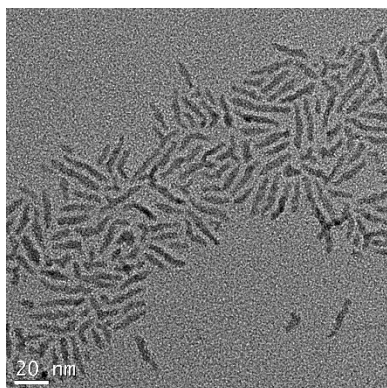

36 min

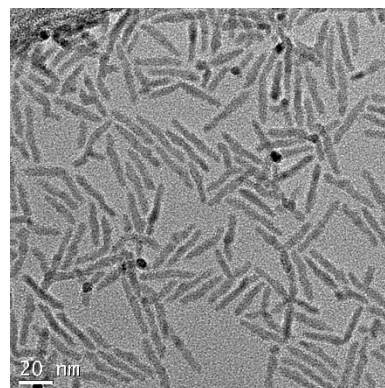

12 min

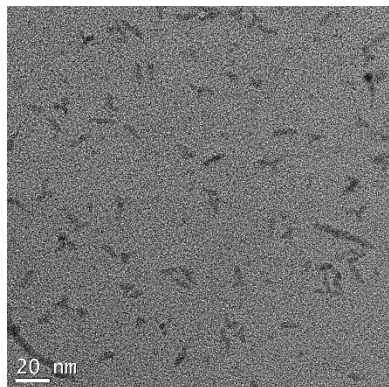

24 min

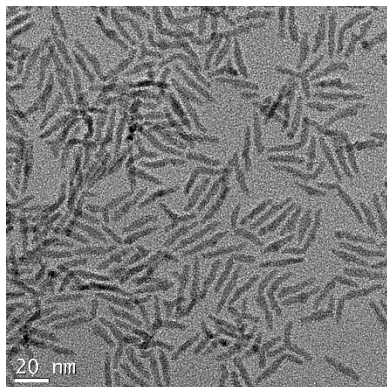

45 min

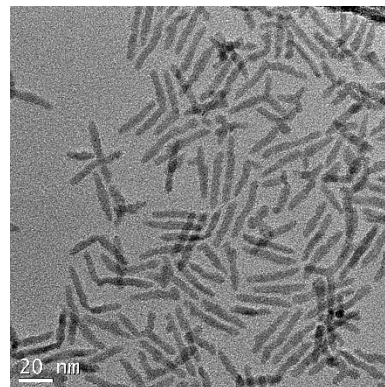

15 min

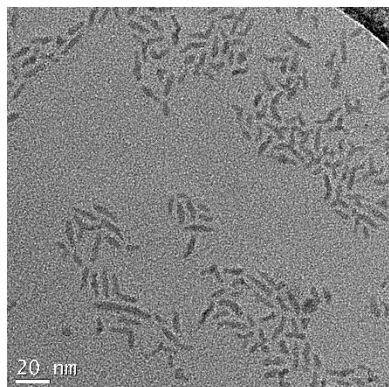

27 min

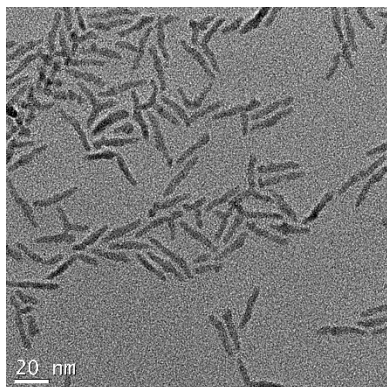

**Figure S14.** TEM of growing CdSe nanorods when precursor is doubled in a single addition event after 7.5 min of reaction time.

9 min

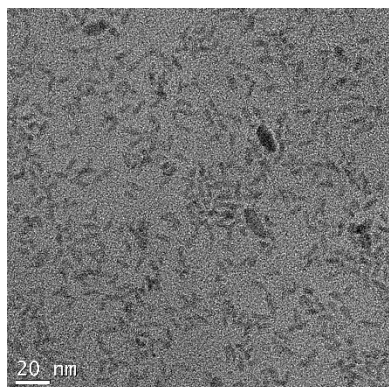

24 min

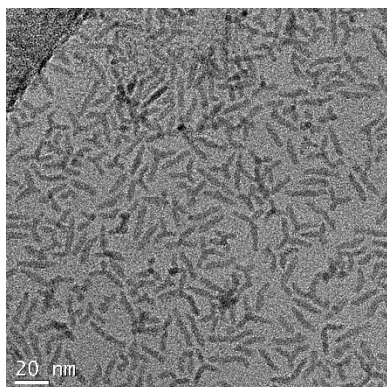

50 min

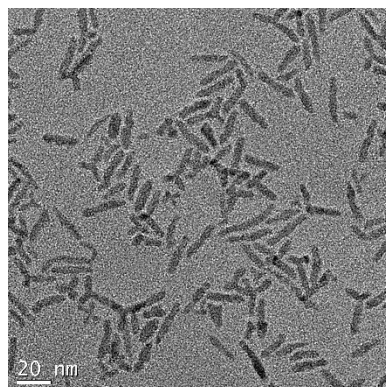

18 min

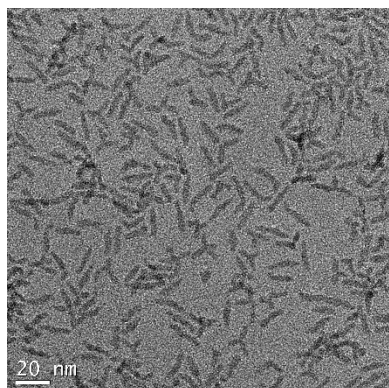

30 min

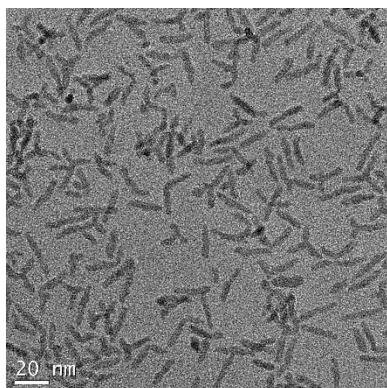

90 min

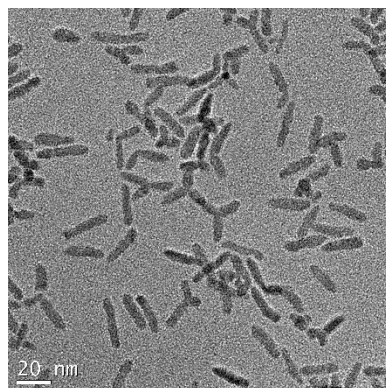

**Figure S15.** TEM of growing CdSe nanorods when 50% more precursor is added in a single event after 7.5 min of reaction time.

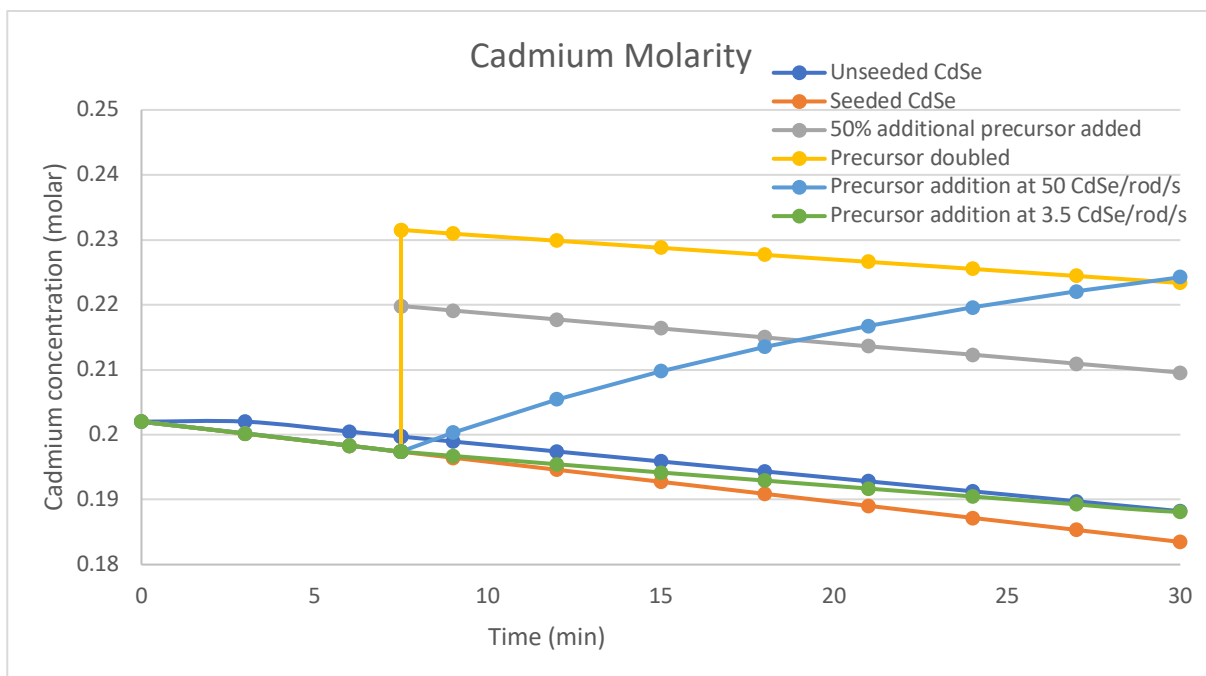

A)

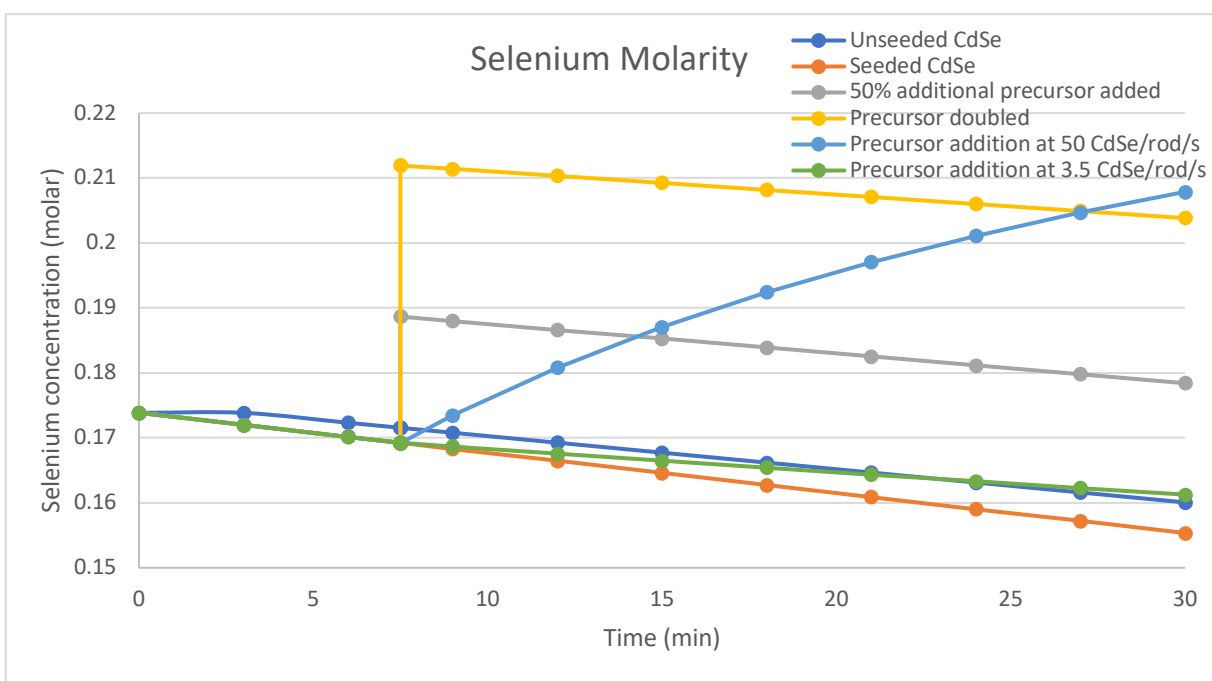

B)



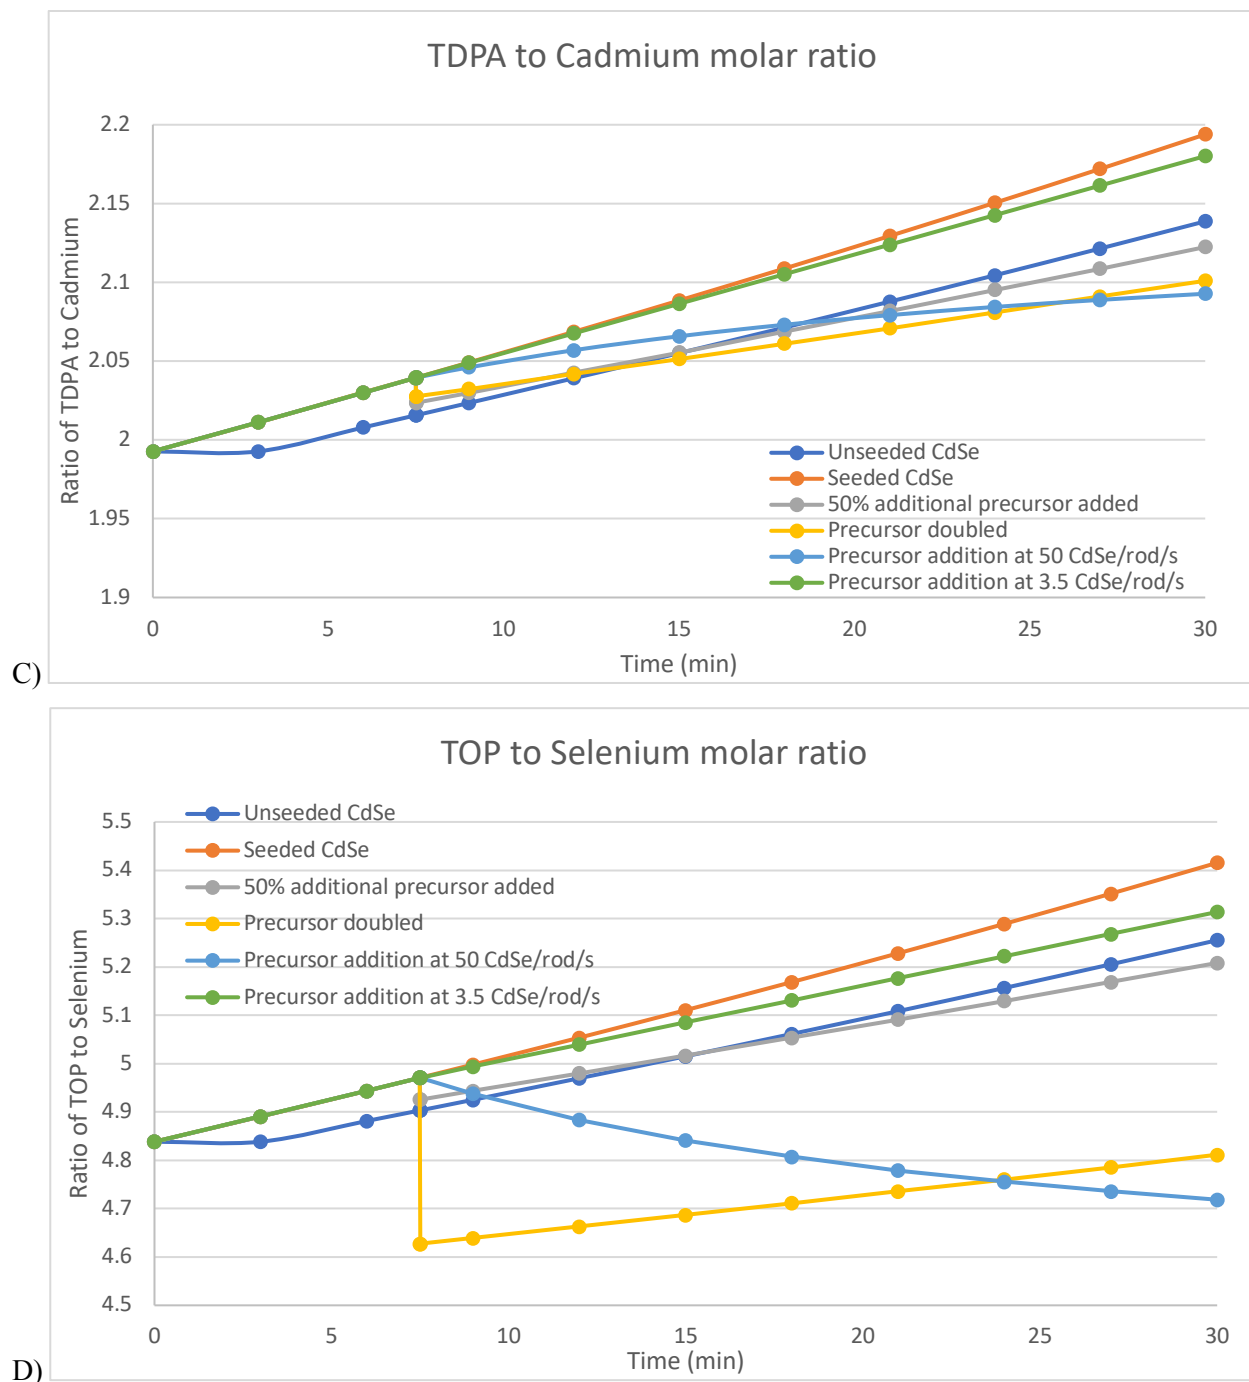

**Figure S16.** Evaluation of precursor concentrations and Cd/Se to ligand ratios to determine thresholds for extending the duration of the 1-D growth regime. Concentration of cadmium (A) and selenium (B) are shown with ligand to Cd/Se ratios for TDPA to Cadmium (C) and TOP to Selenium (D) are simulated over the first 30 min of the reaction assuming constant growth rates for the nanorods.

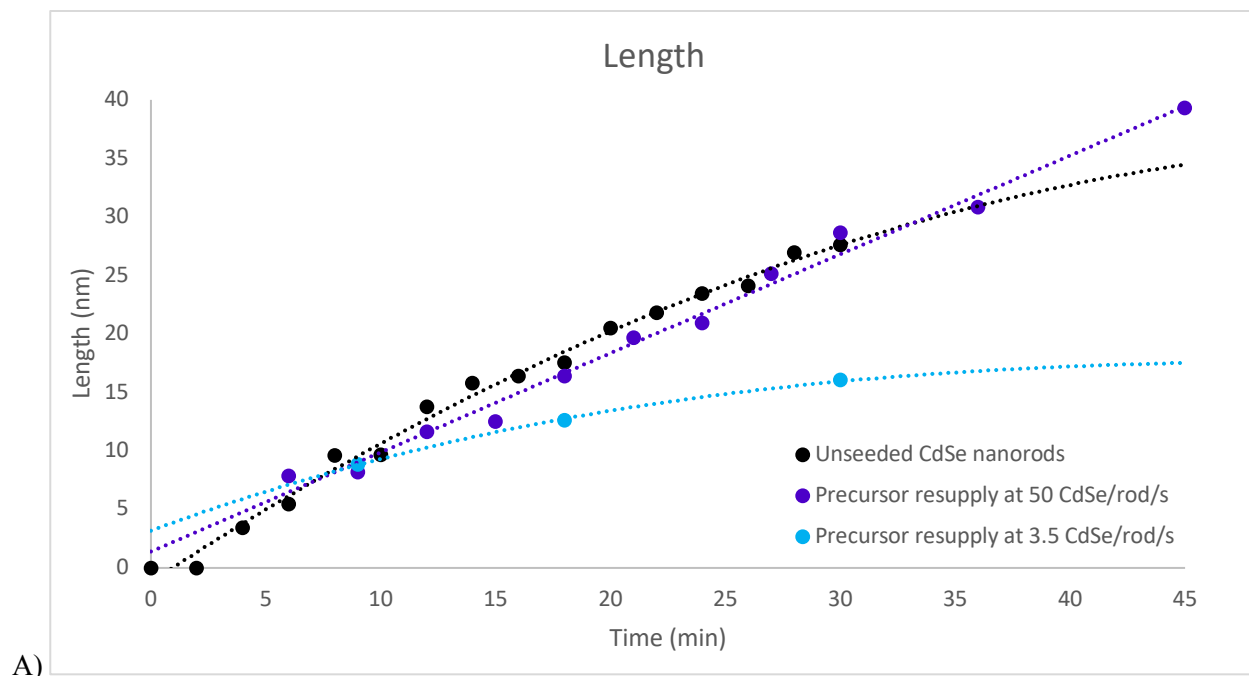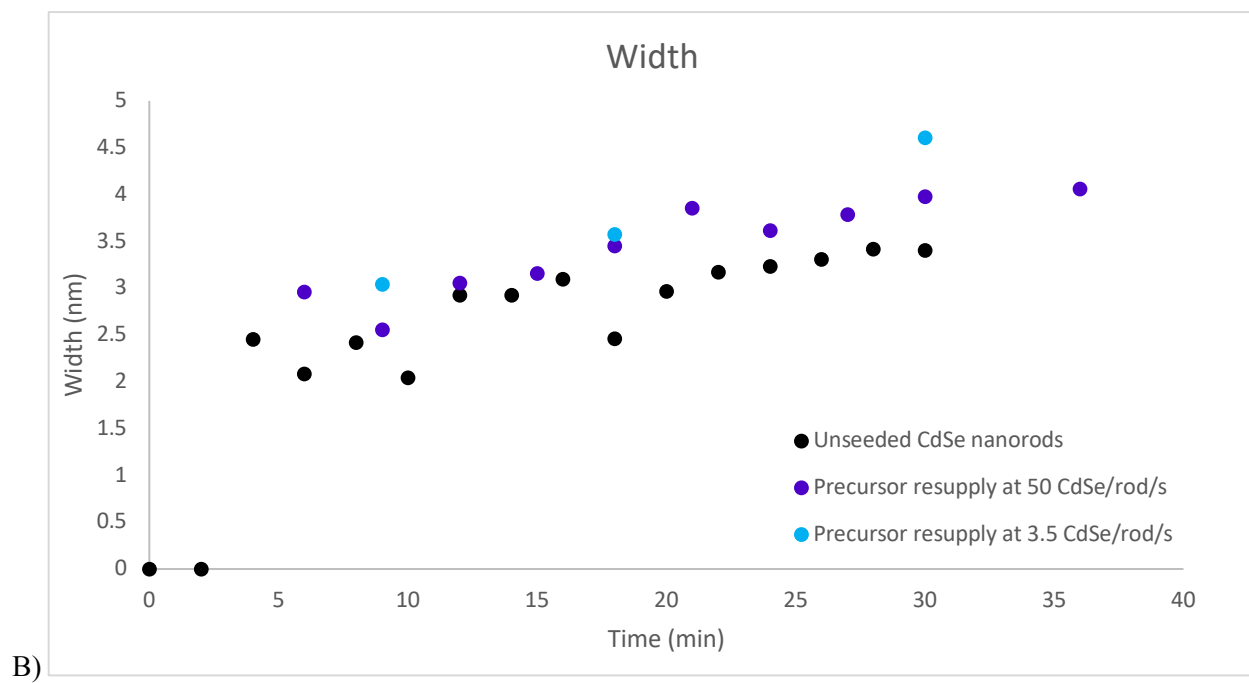

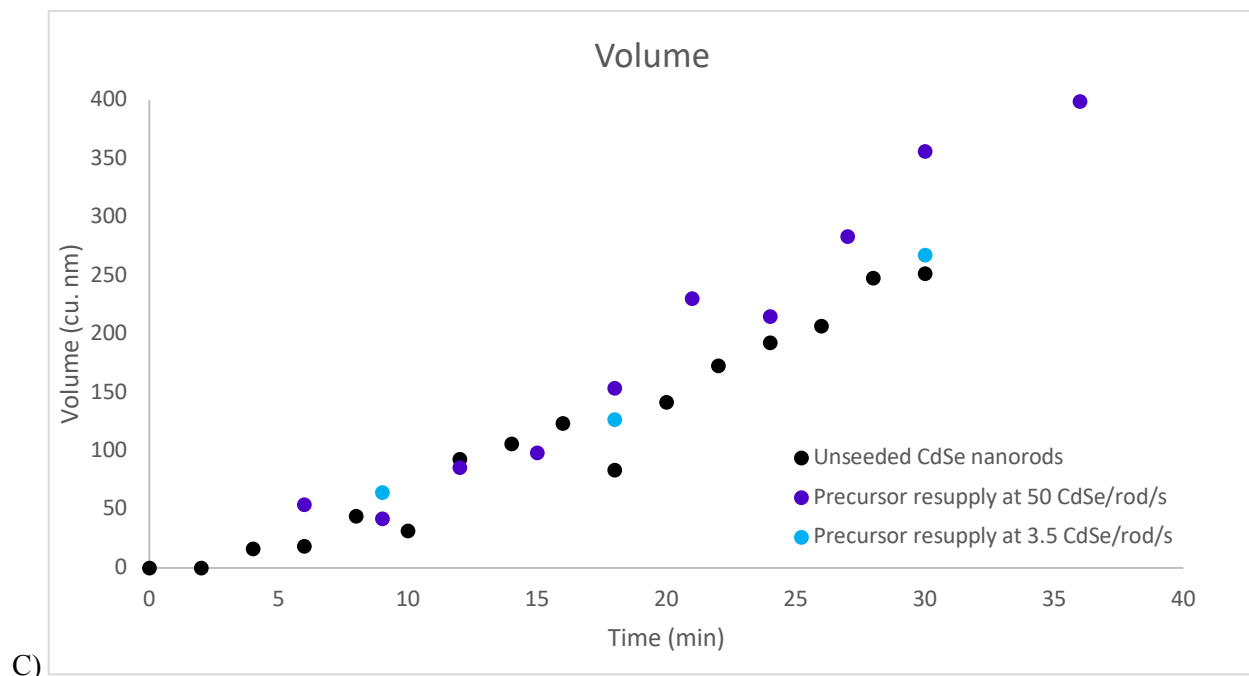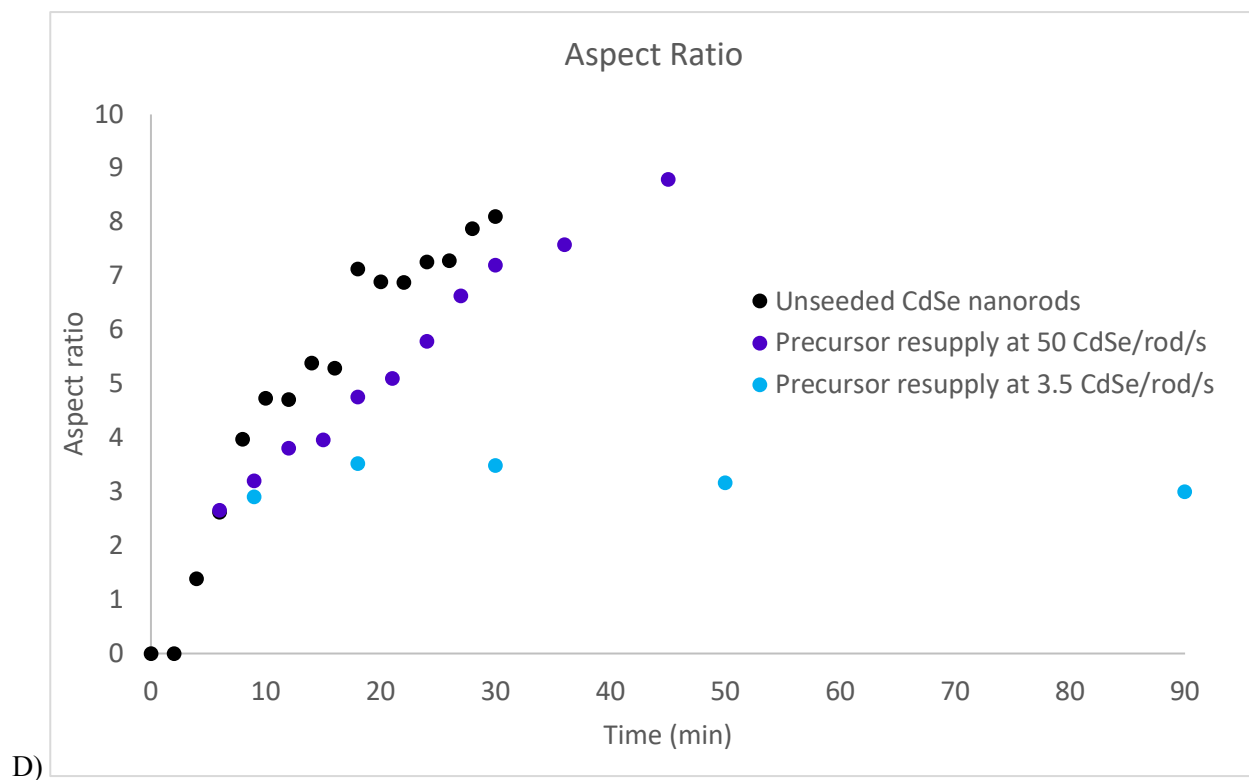

**Figure S17.** Replenishment of additional precursor: Length (A), width (B), volume (C), and aspect (D) profiles over time.

6 min

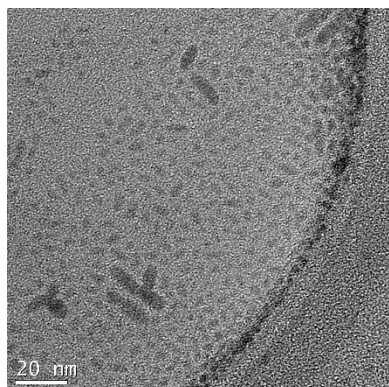

18 min

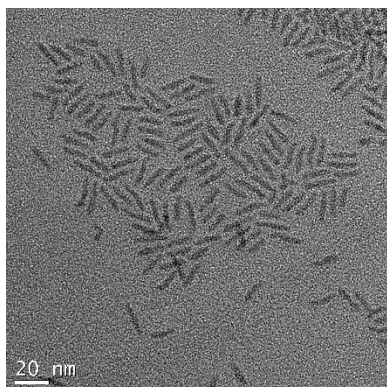

30 min

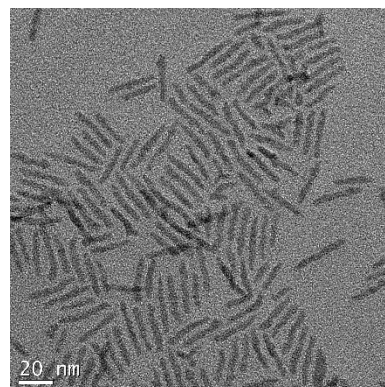

9 min

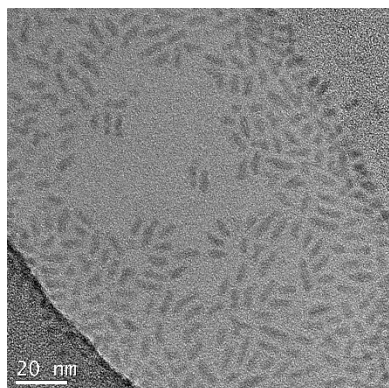

21 min

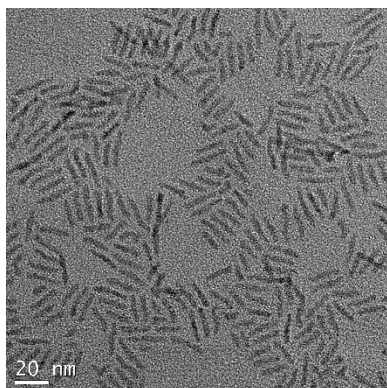

36 min

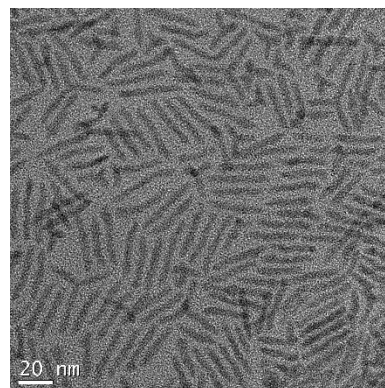

12 min

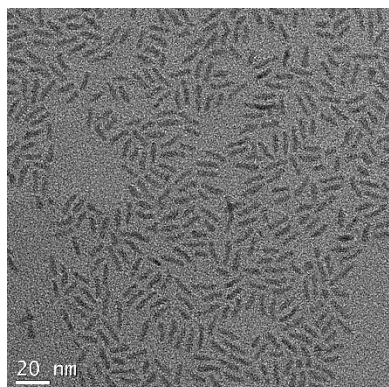

24 min

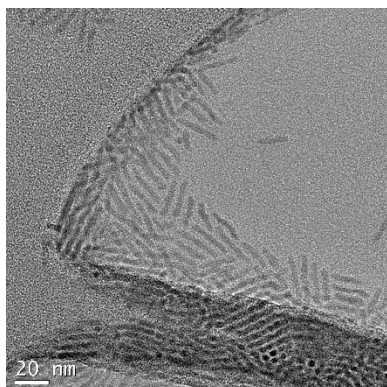

45 min

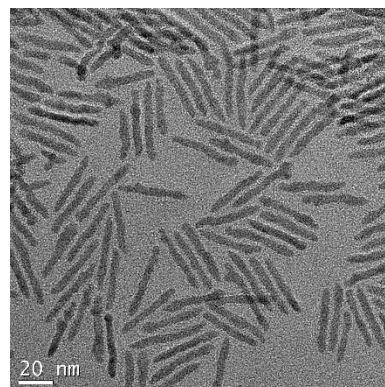

15 min

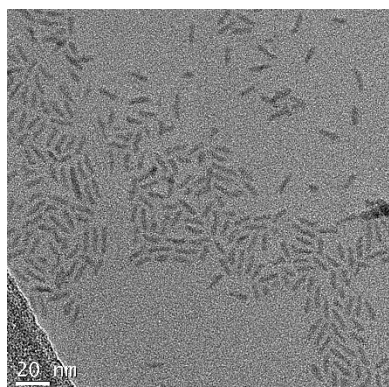

27 min

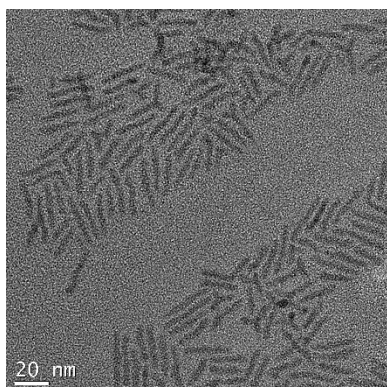

**Figure S18.** TEM of growing CdSe nanorods when precursor is resupplied at a steady rate of 50 monomers  $\text{rod}^{-1} \text{s}^{-1}$ .



9 min

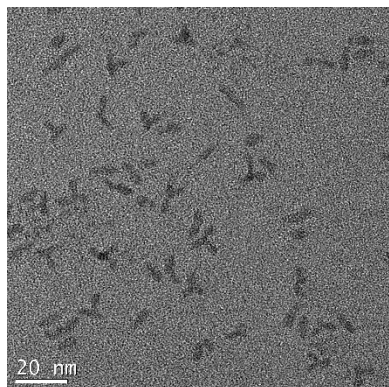

30 min

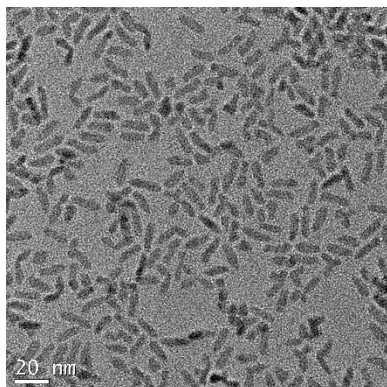

90 min

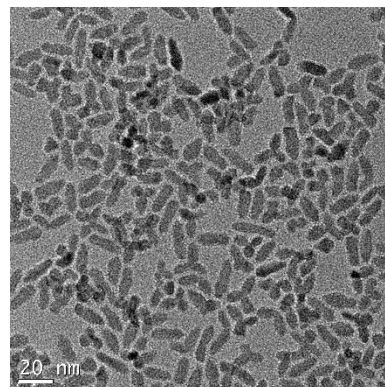

18 min

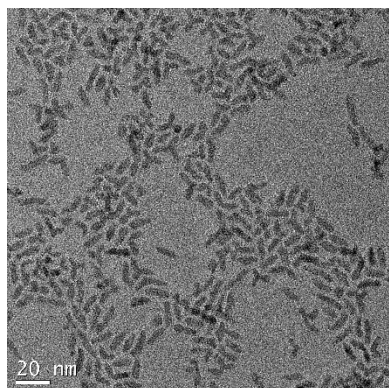

50 min

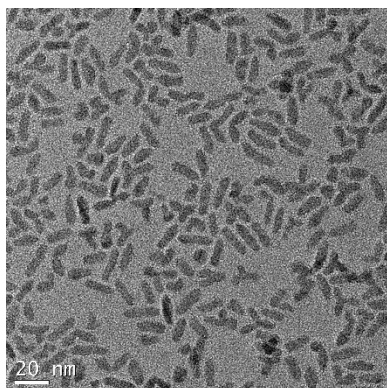

**Figure S19.** TEM of growing CdSe nanorods when precursor is resupplied at a steady rate of  $3.5 \text{ monomers rod}^{-1} \text{ s}^{-1}$ .

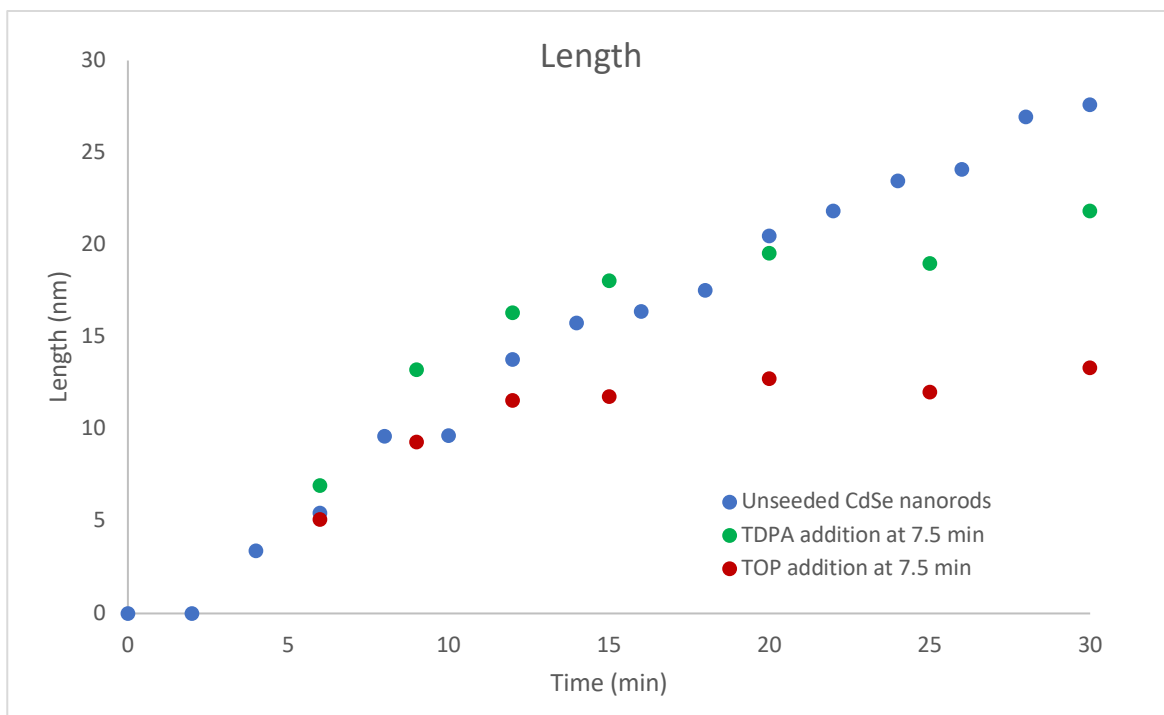

A)

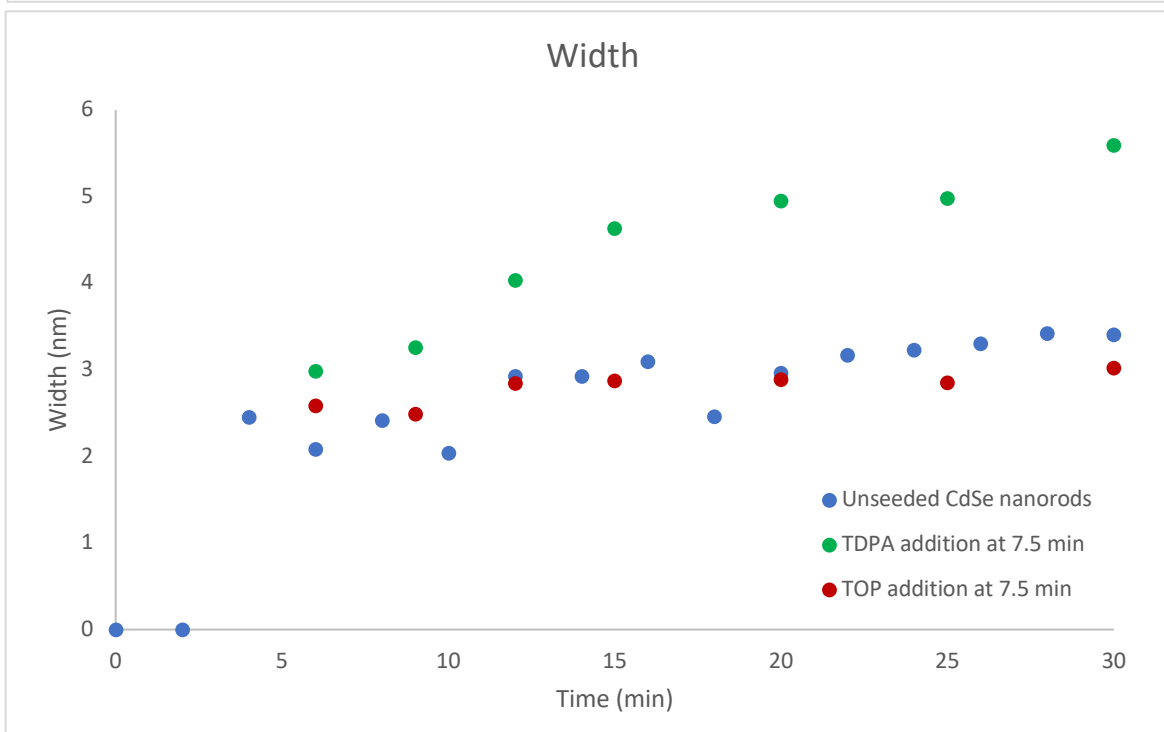

B)

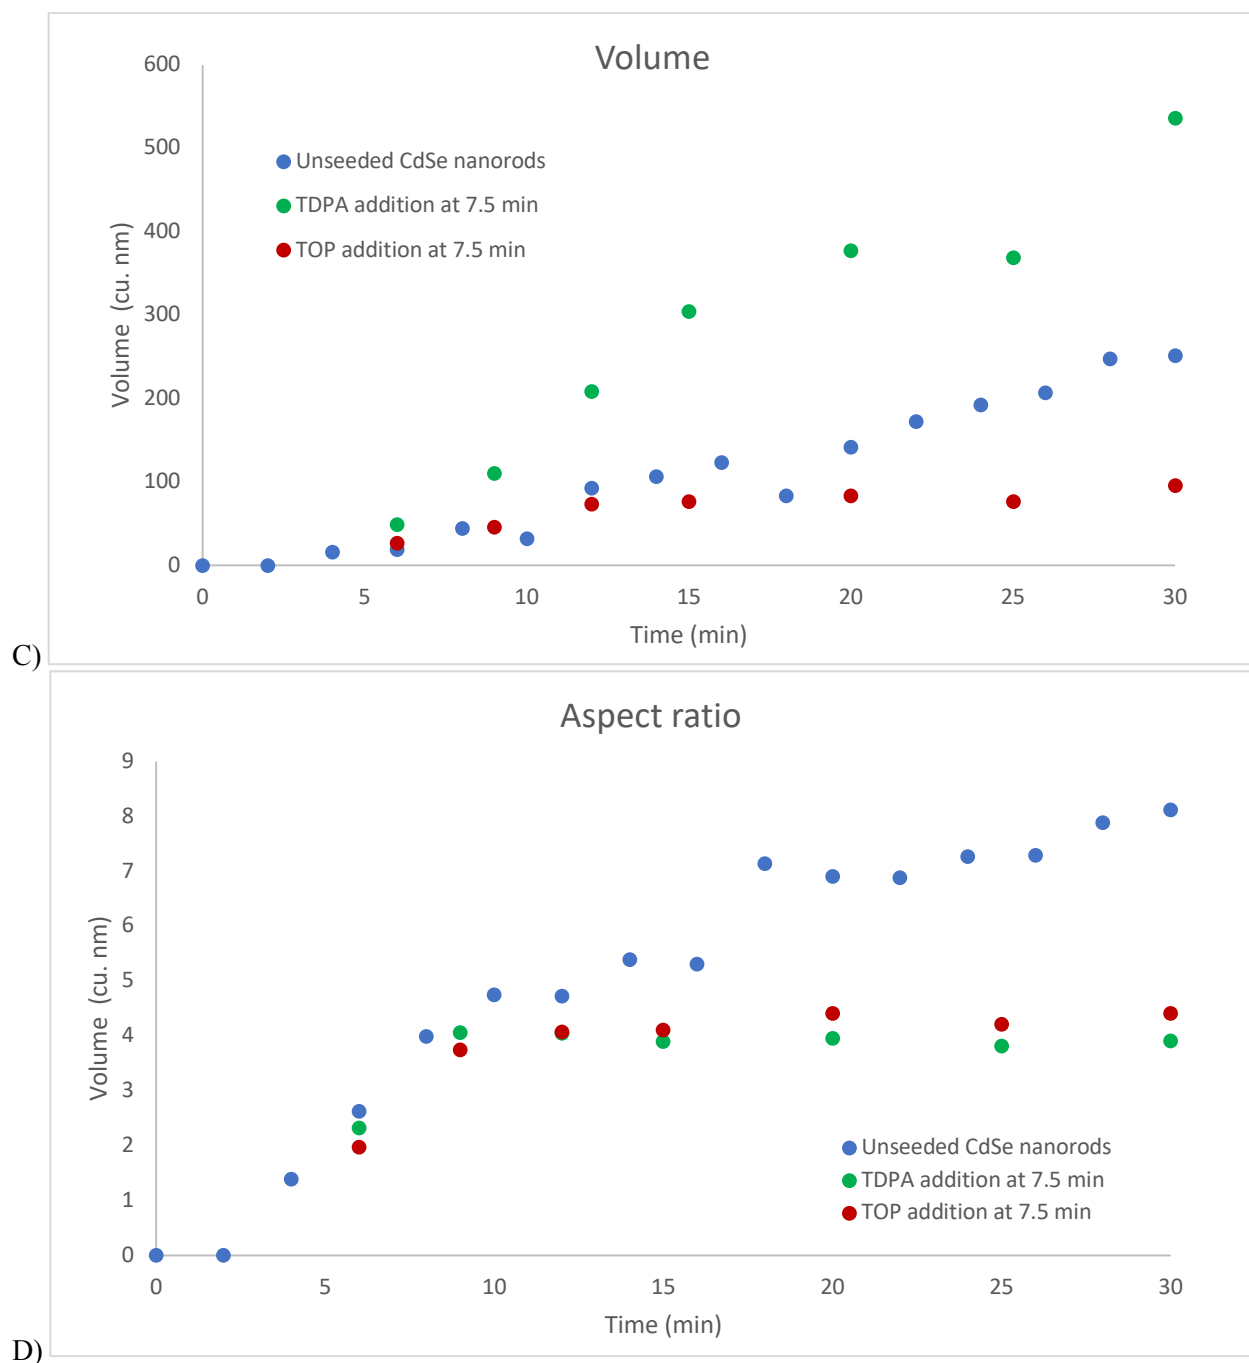

**Figure S20.** Additional TDPA or TOP added to growing CdSe nanorods. Additional TDPA, 0.14 g to push the TDPA: Cd ratio over 2.1:1, is added at 7.5 min to force premature exit from the 1-D growth regime. Likewise, additional TOP, 0.3 mL to push the TOP: Se ratio just over 5.1:1, is added at 7.5 min under otherwise identical growth conditions to typical CdSe nanorod growth. Length (A), width (B), volume (C), and aspect ratio (D) illustrate an early departure from the 1-D growth regime when TDPA or TOP is added to the growing nanorods.

6 min

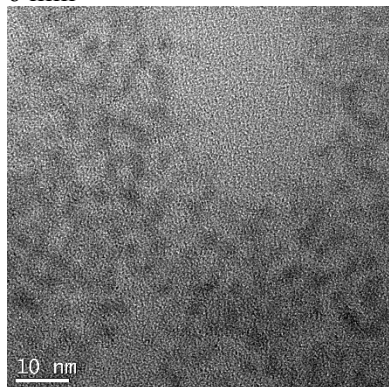

15 min

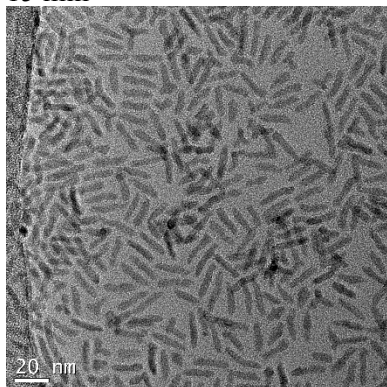

30 min

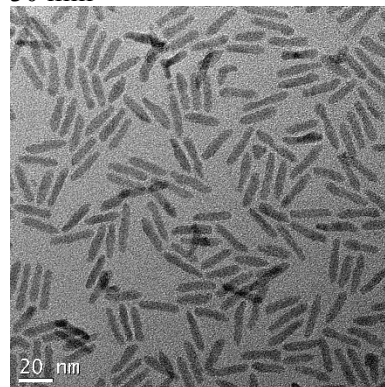

9 min

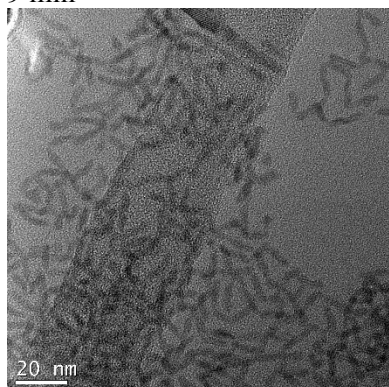

20 min

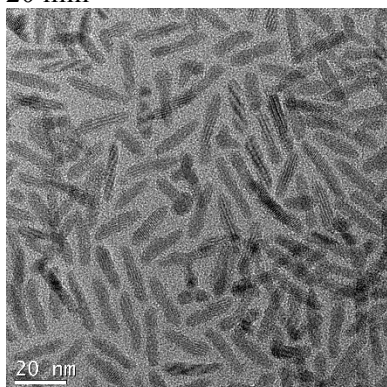

12 min

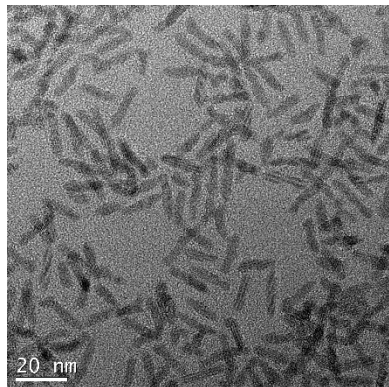

25 min

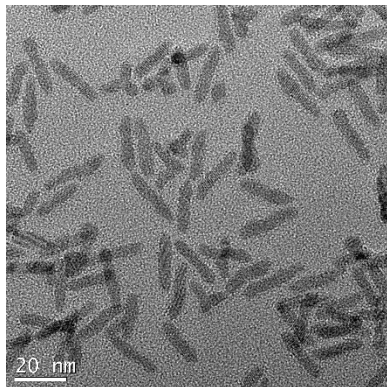

**Figure S21.** TEM of growing CdSe nanorods when extra TDPA is added at 7.5 min.



6 min

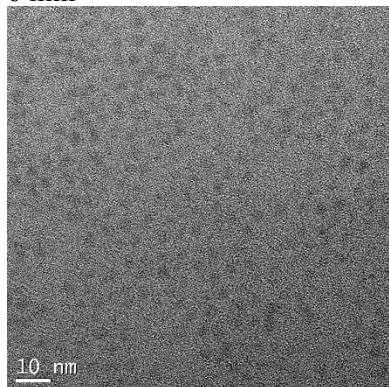

15 min

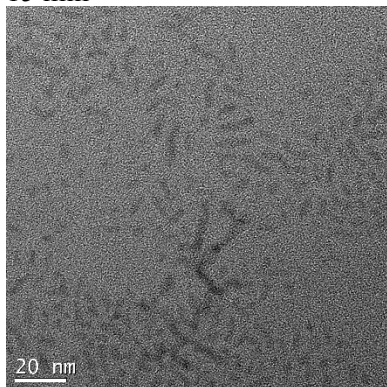

30 min

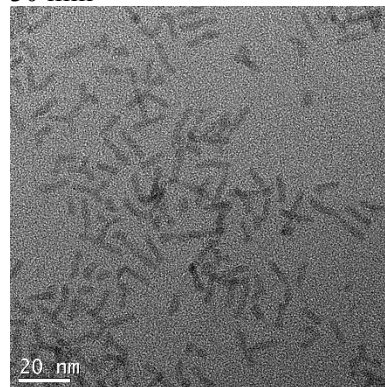

9 min

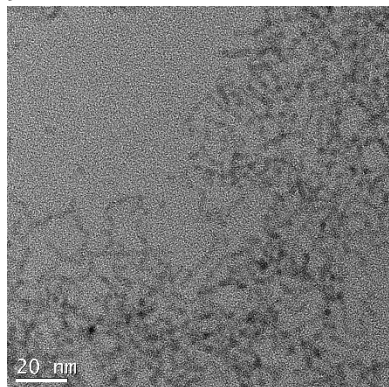

20 min

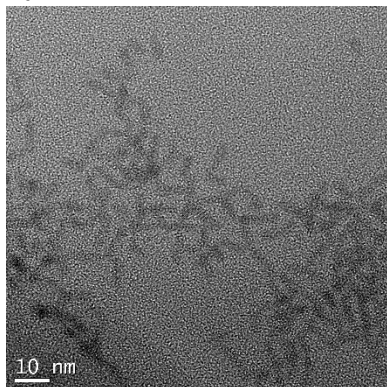

12 min

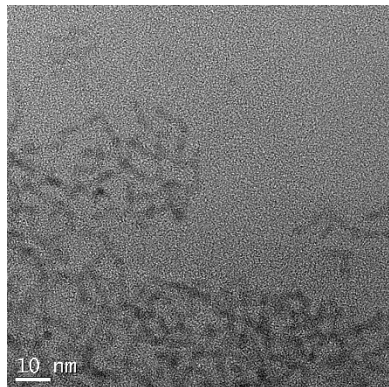

25 min

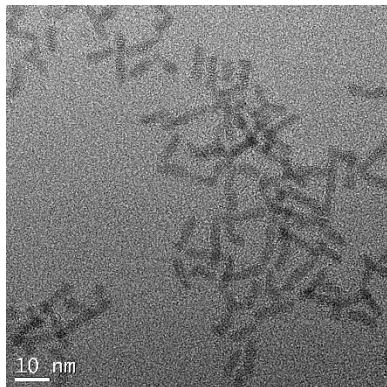

**Figure S22.** TEM of growing CdSe nanorods when extra TOP is added at 7.5 min.
